# Supplementary material for: Replicated high-density genetic maps of two great tit populations reveal fine-scale genomic departures from sex-equal recombination rates
Source: PubMed Central journal article supplement — Heredity (Edinb). 2013 Oct 23;112(3):307–16. doi: 10.1038/hdy.2013.107 (PMC3931172; doi:10.1038/hdy.2013.107), 2013-10-23

# PMA1

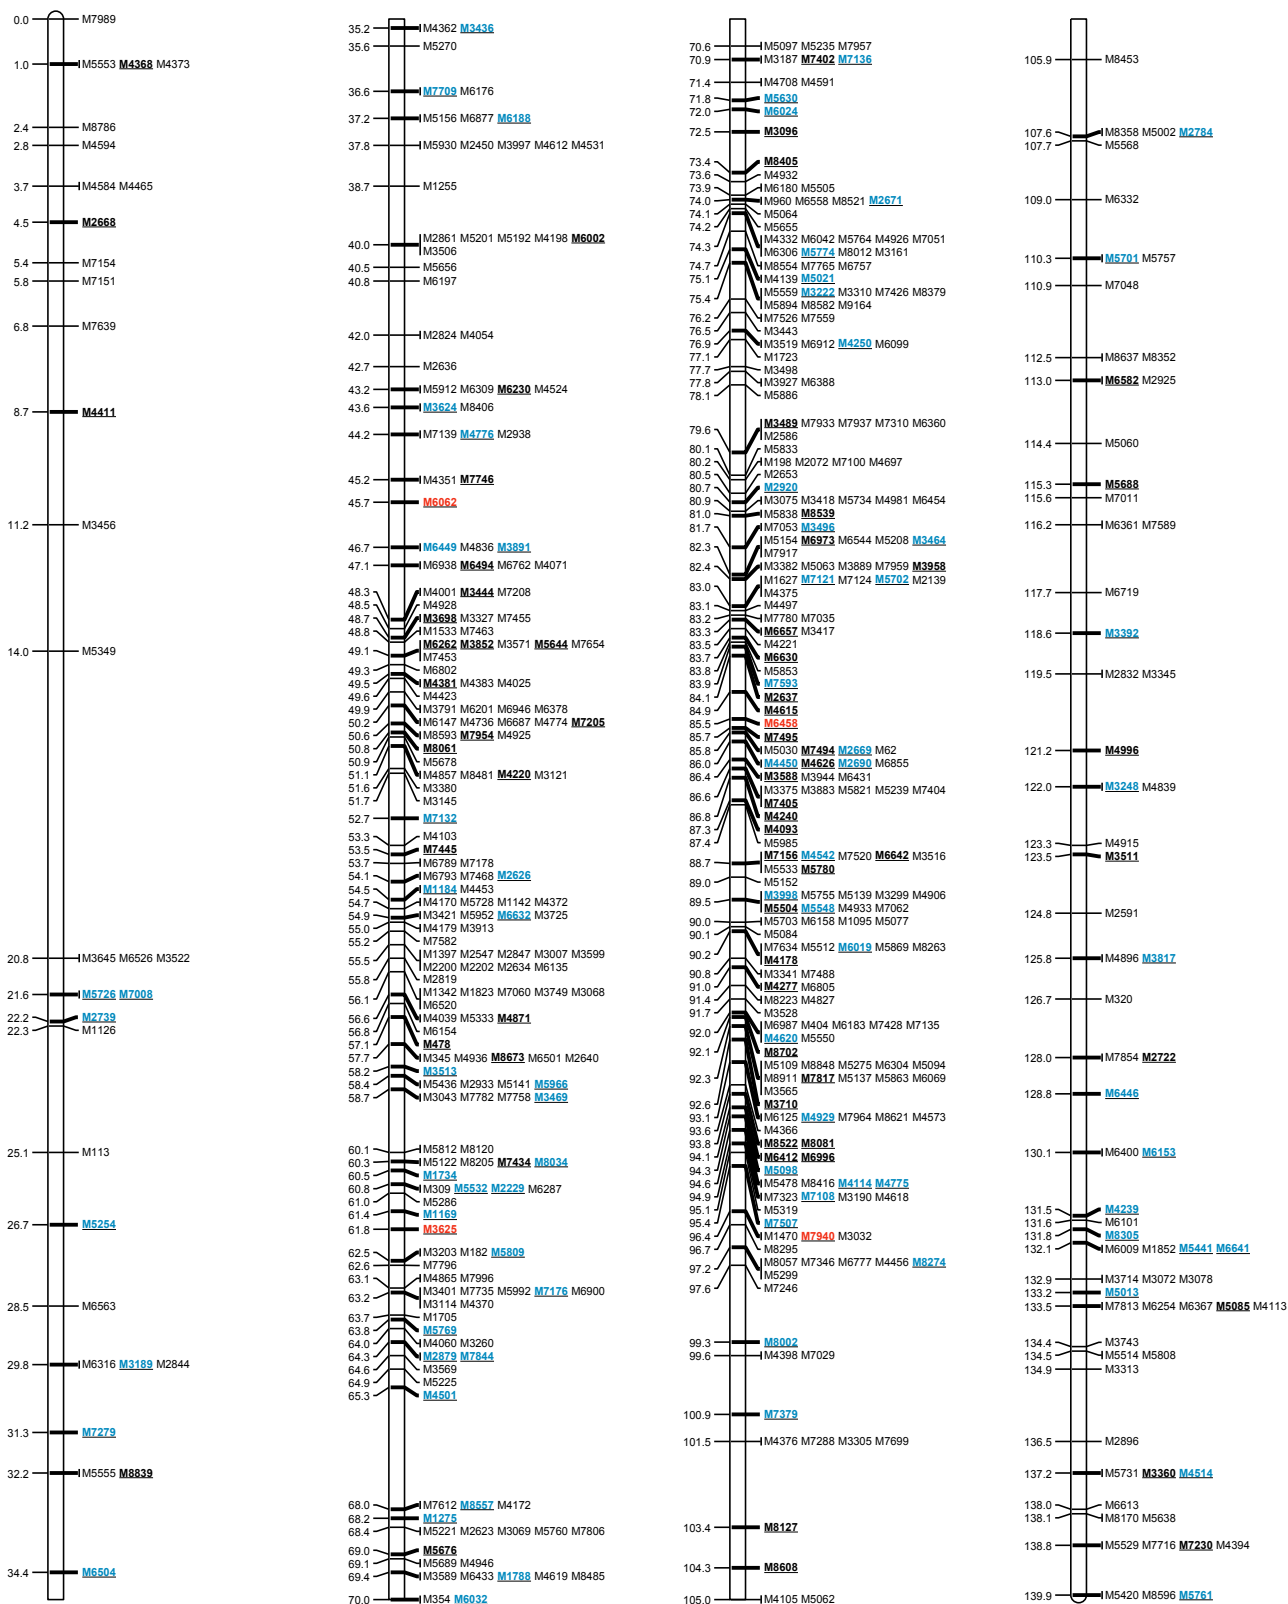

Supplementary Figure 2.

# PMA1A

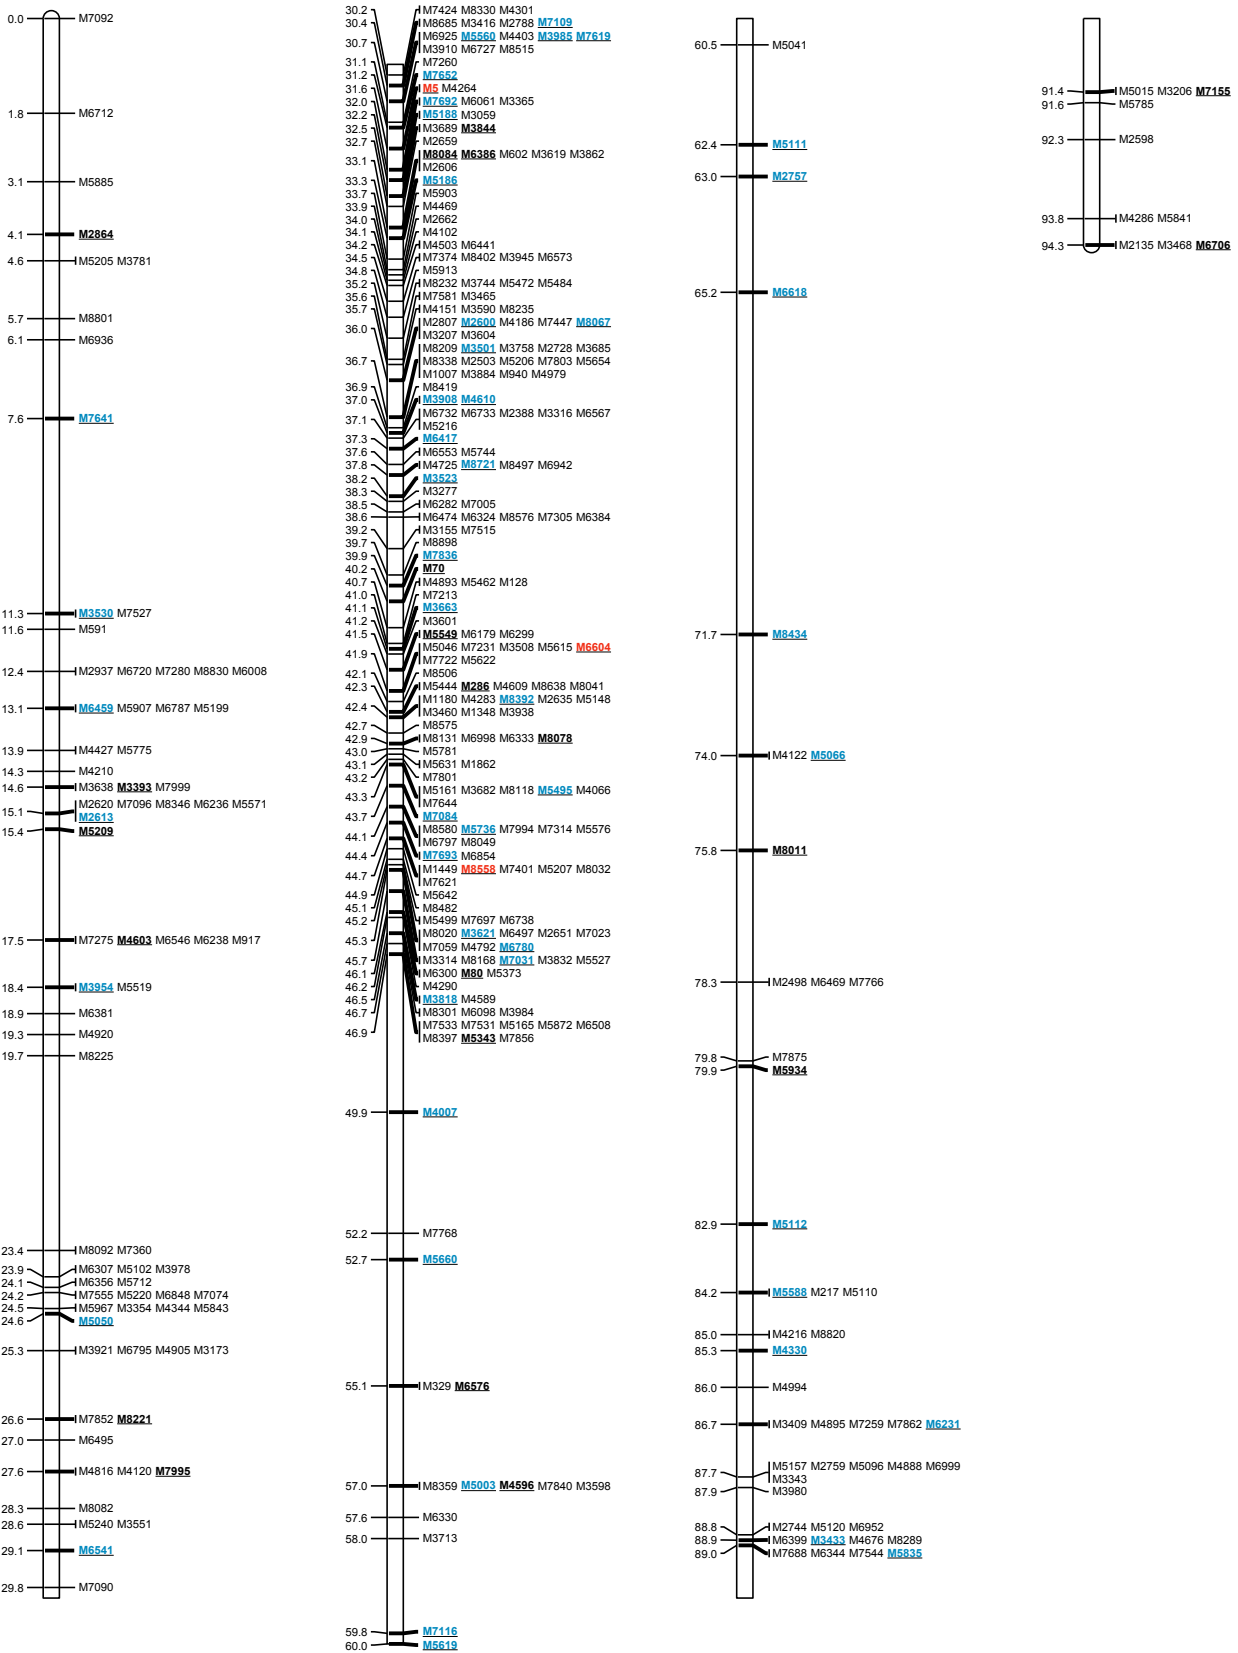

# PMA2

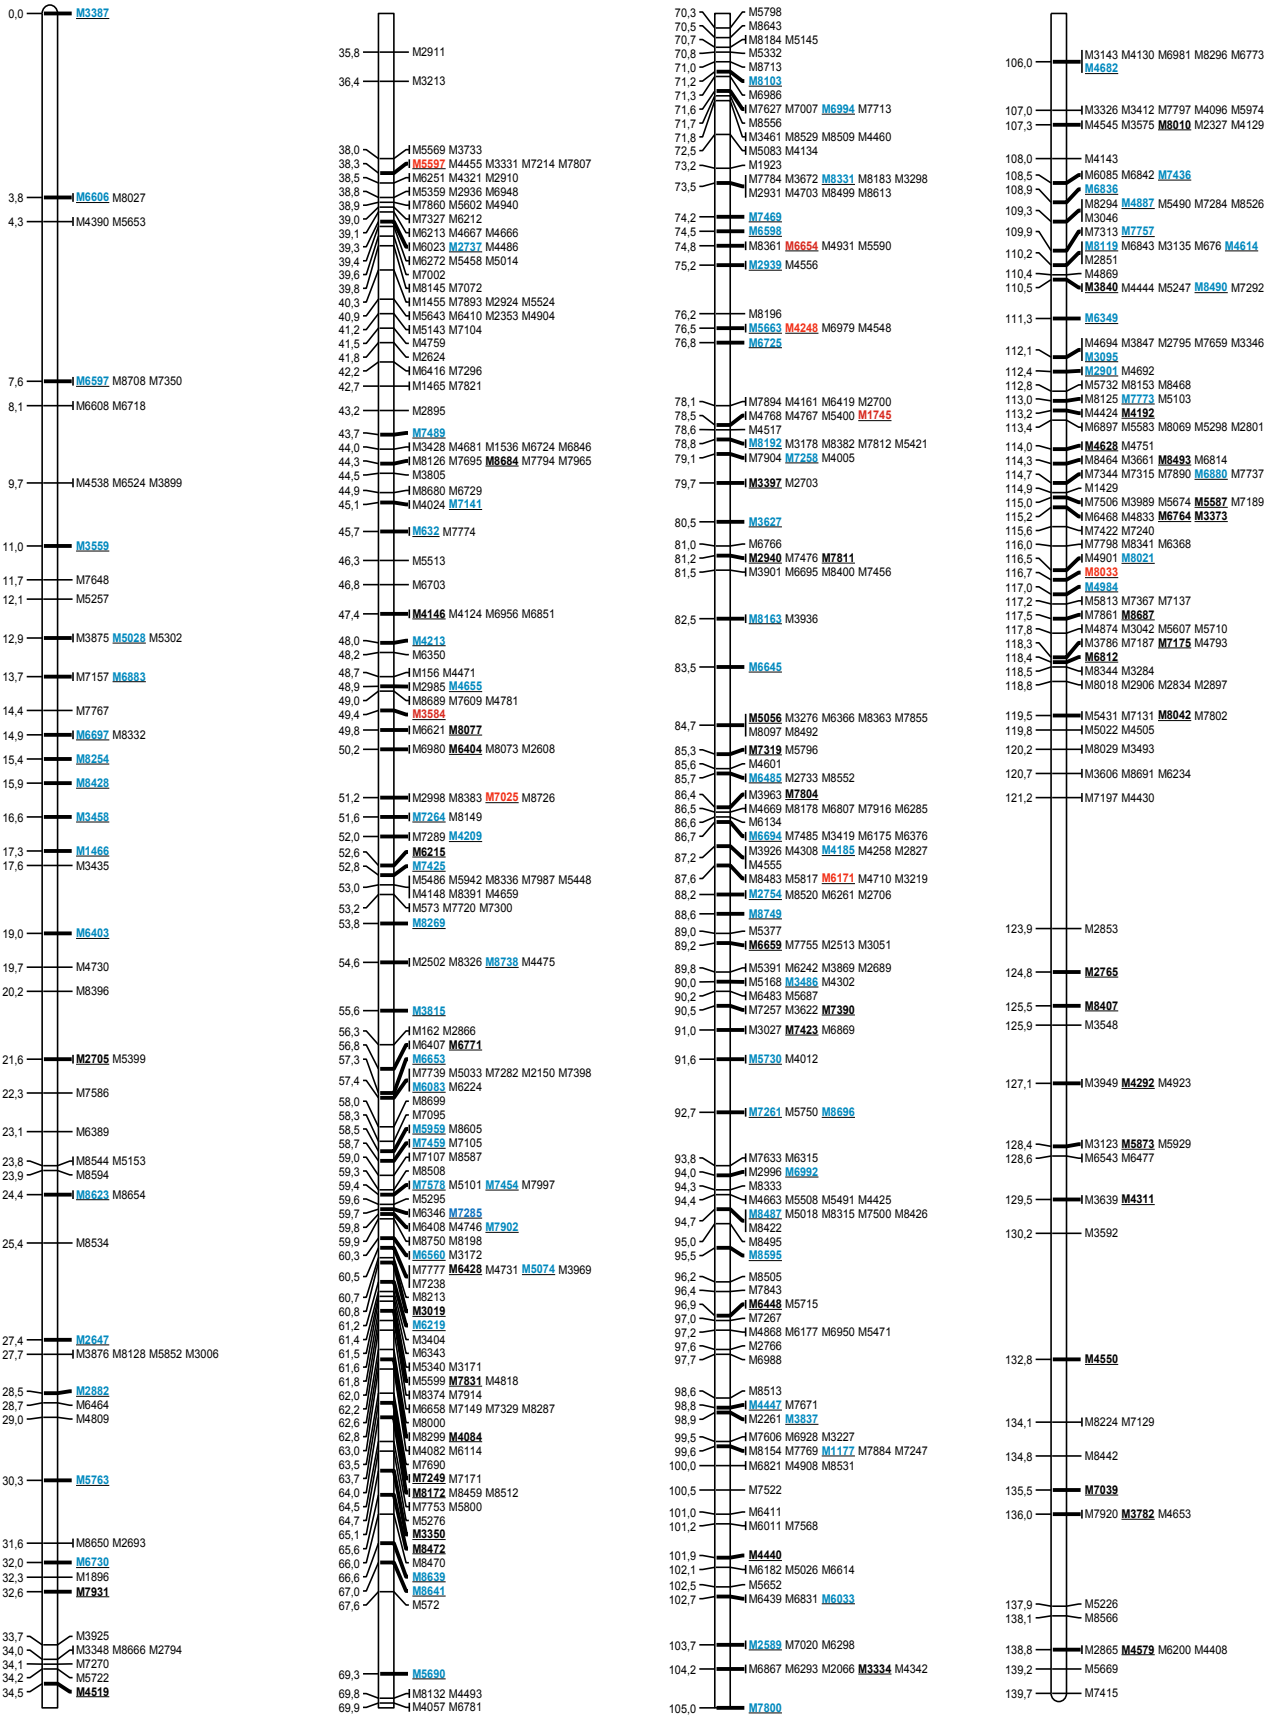

# PMA3

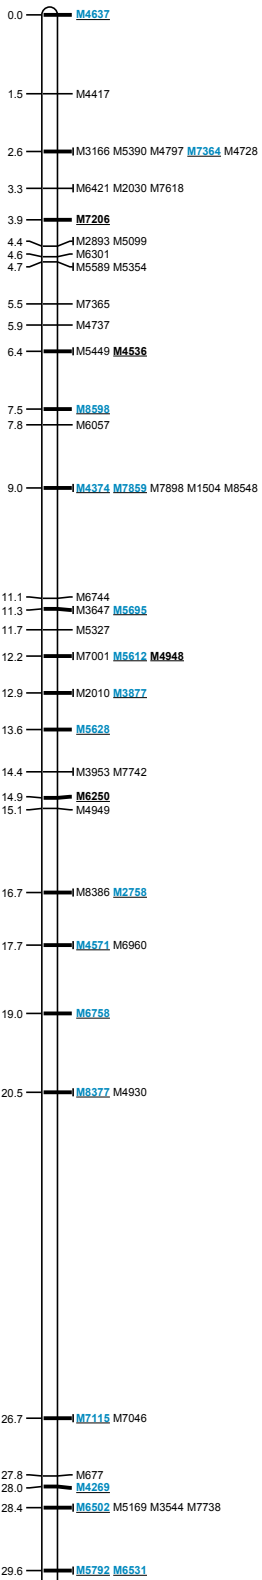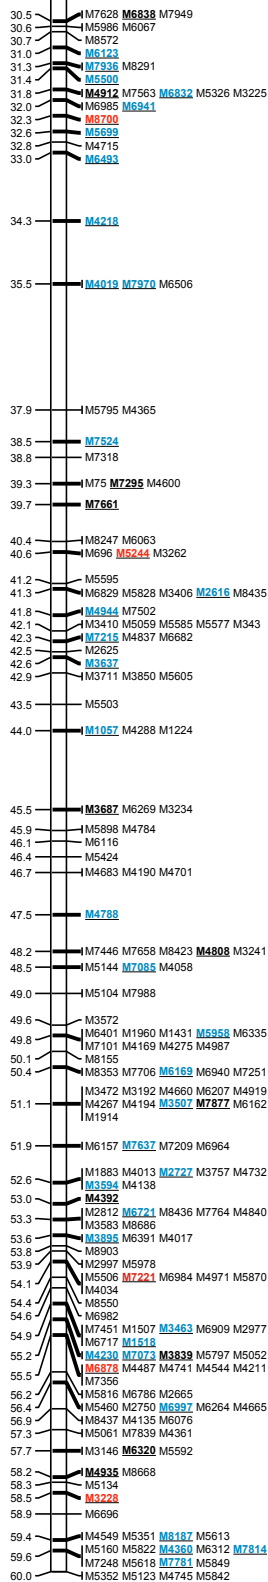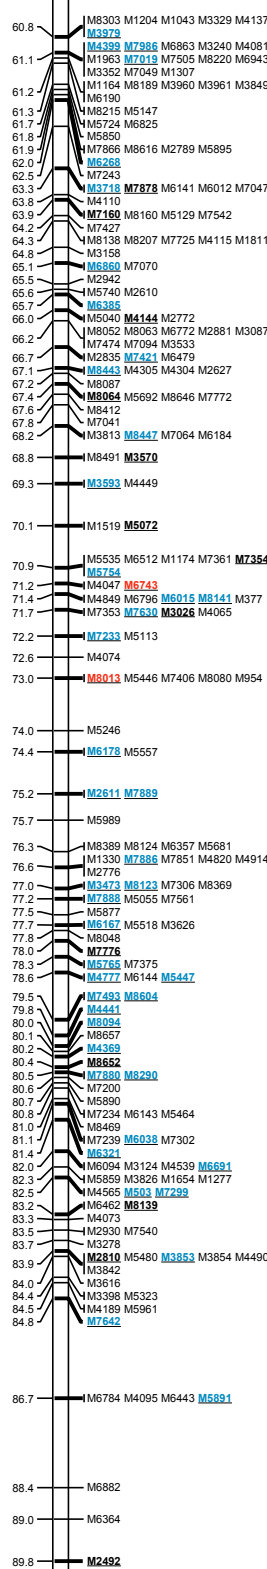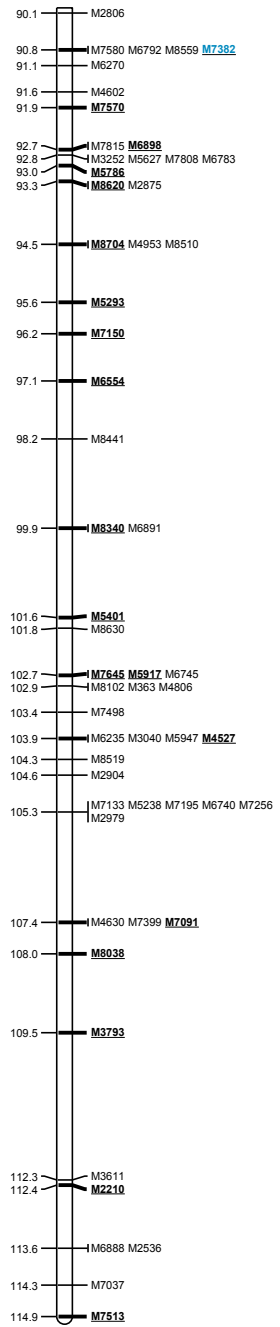

# PMA4

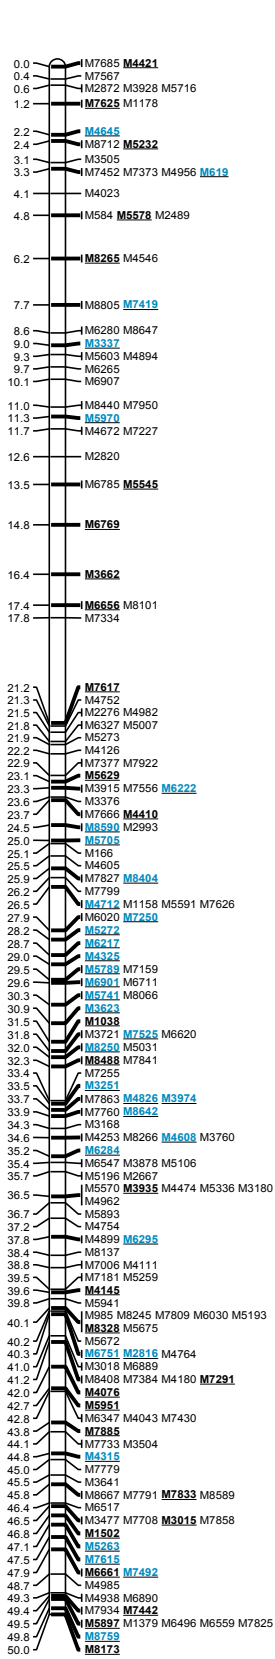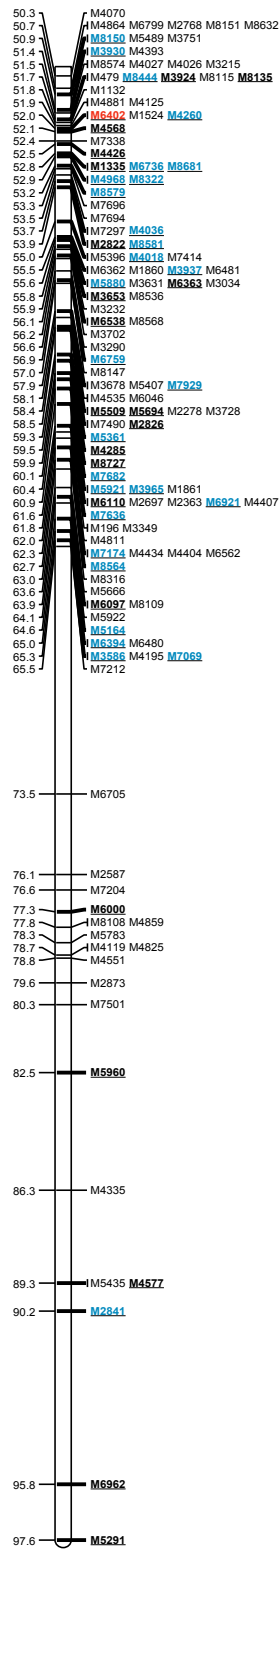

# PMA4A

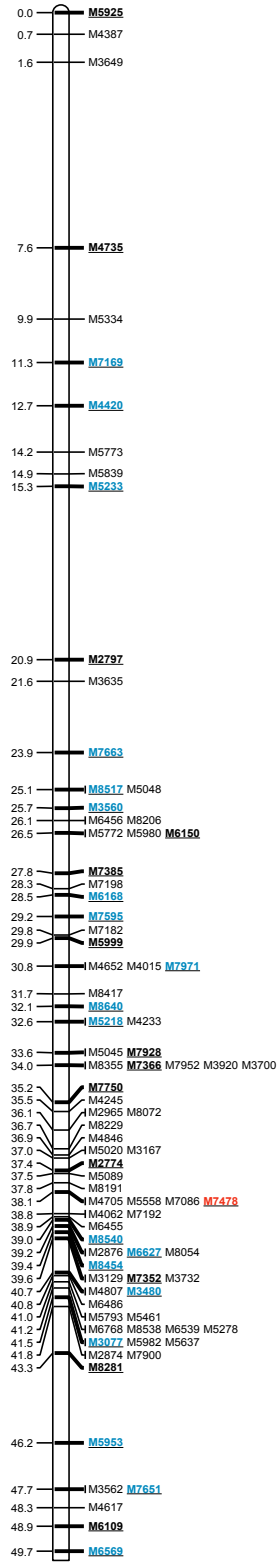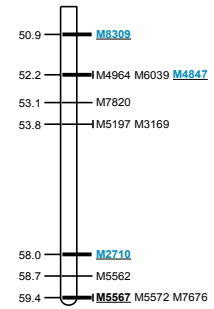

# PMA5

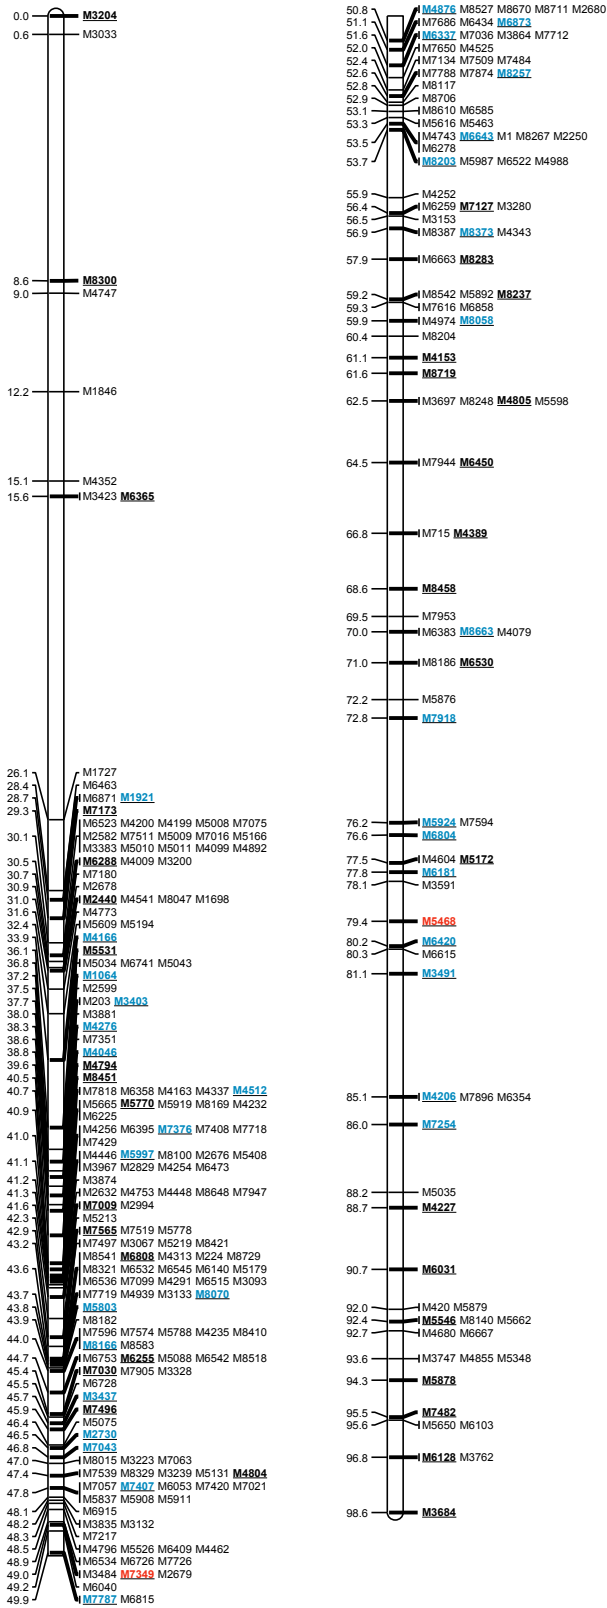

# PMA6

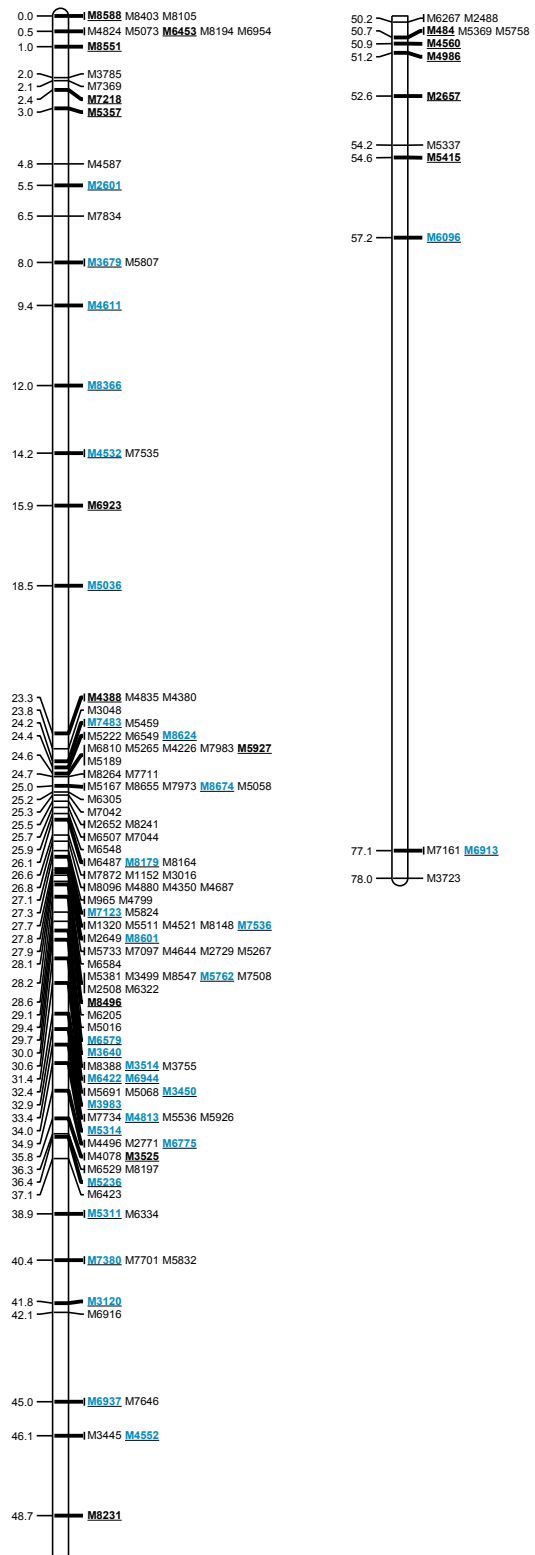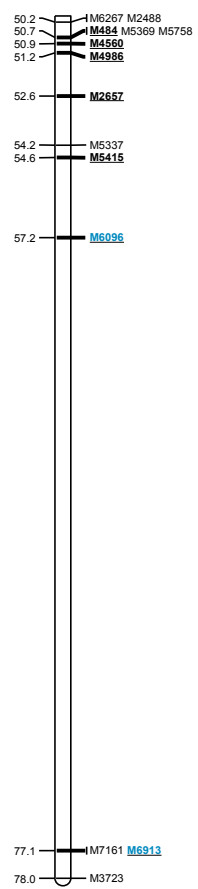

# PMA7

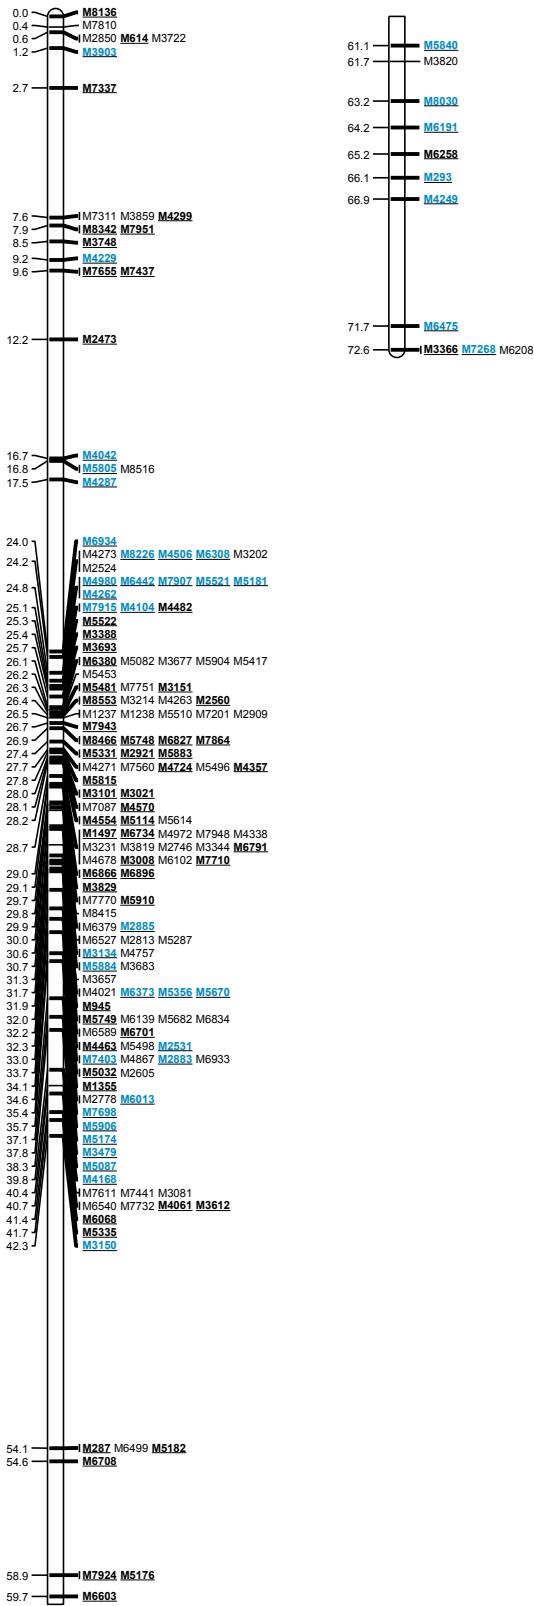

# PMA8

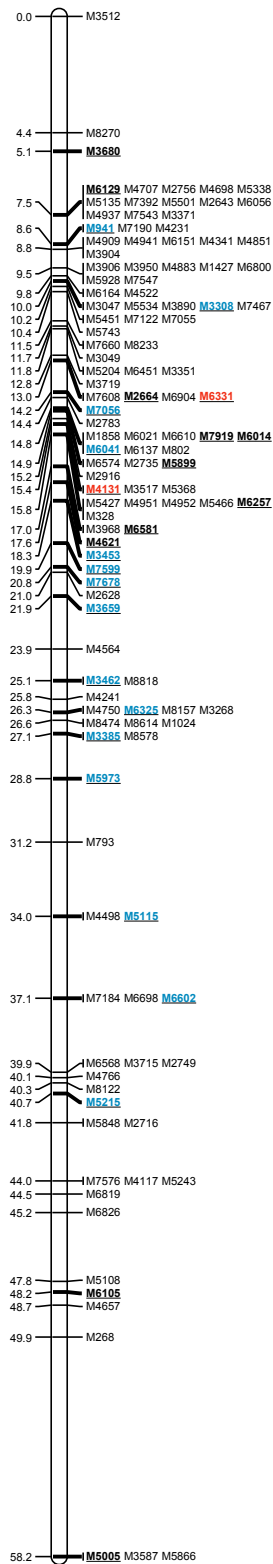

# PMA9

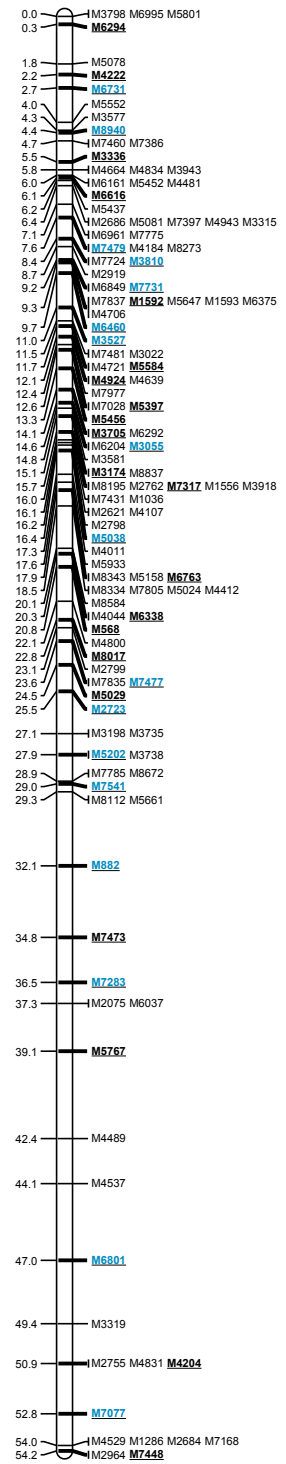

# PMA10

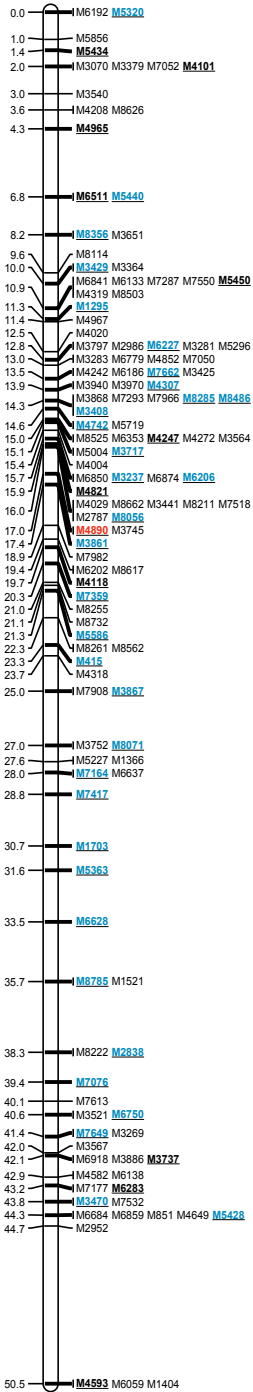

# PMA11

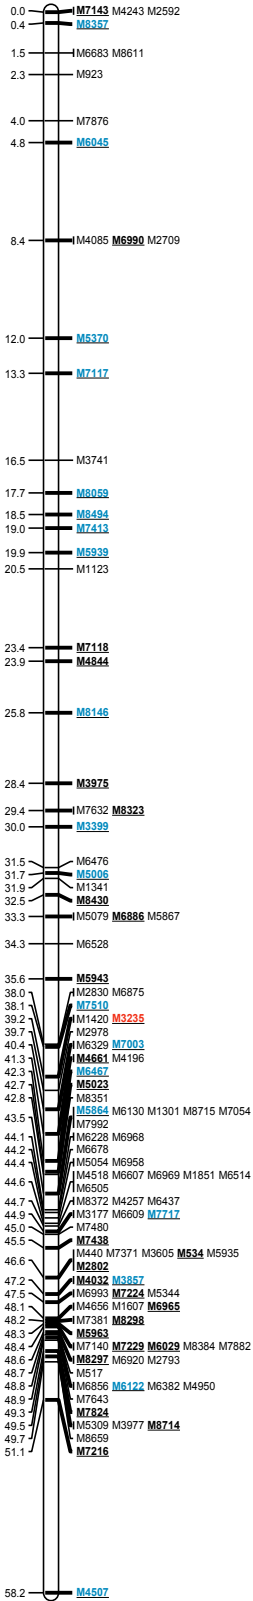

# PMA12

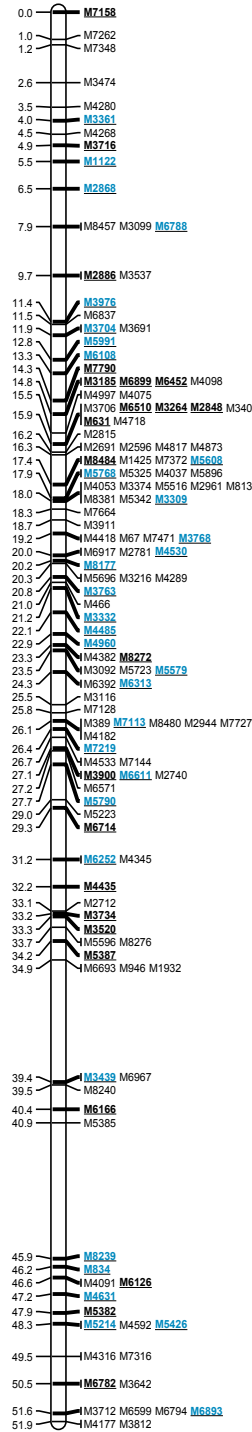

# PMA13

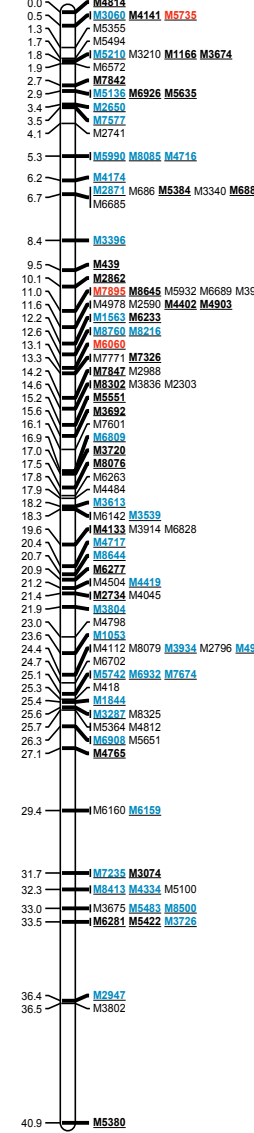



# PMA14

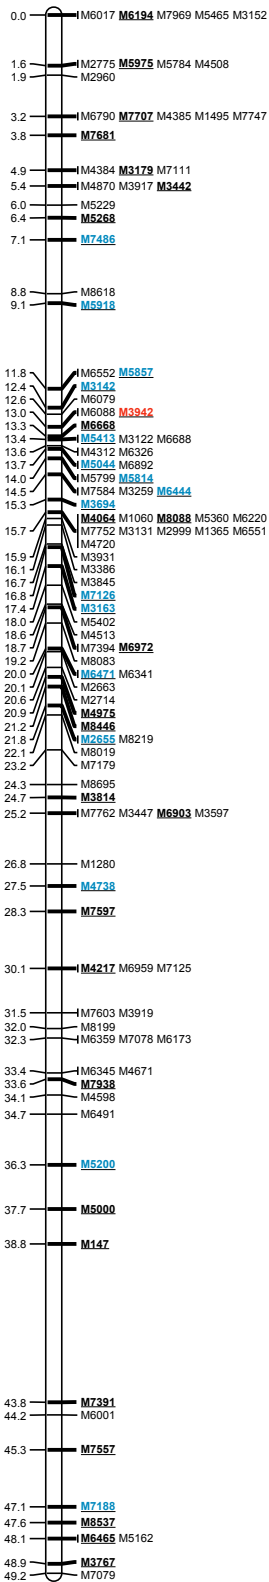

# PMA15

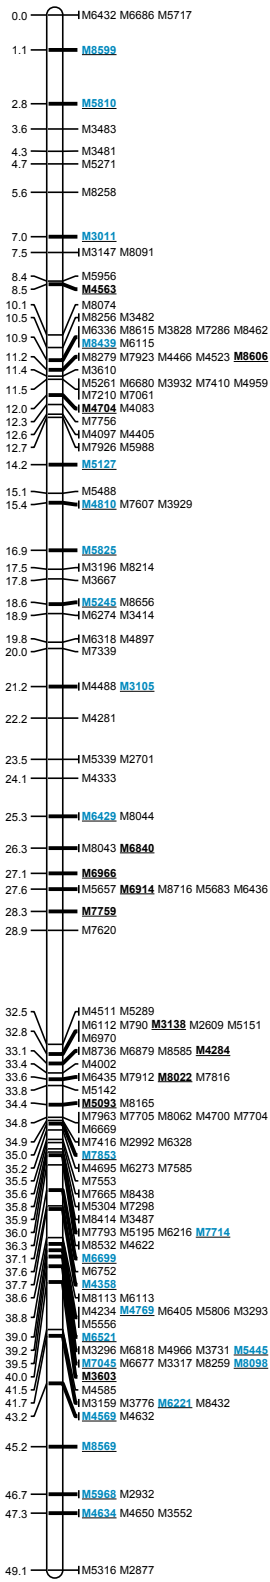

# PMA17

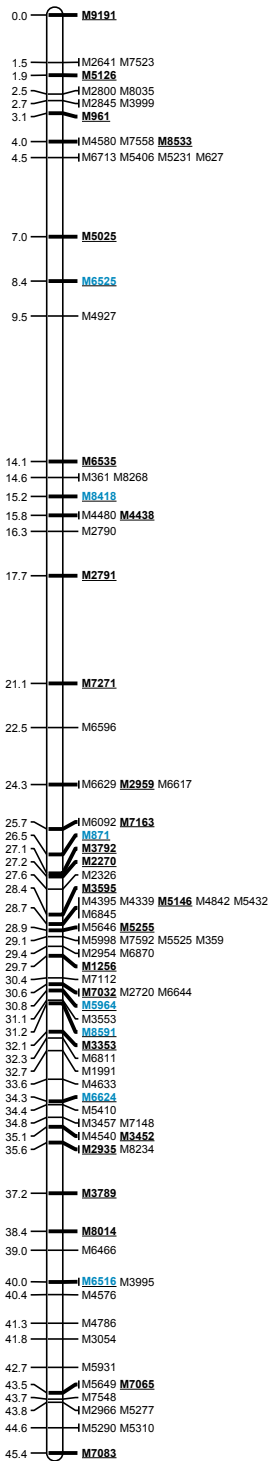

# PMA18

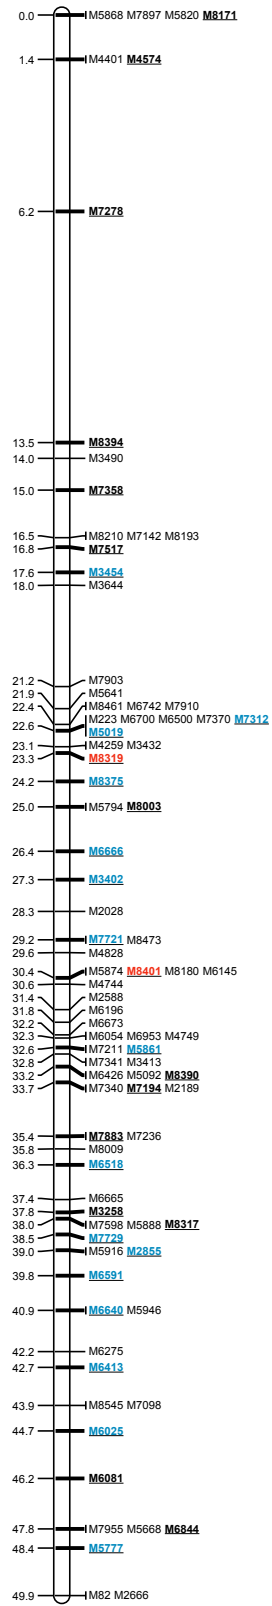

# PMA19

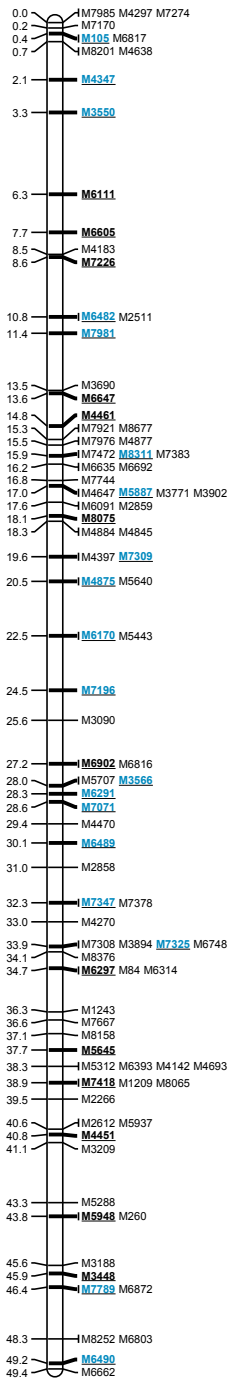

# PMA20

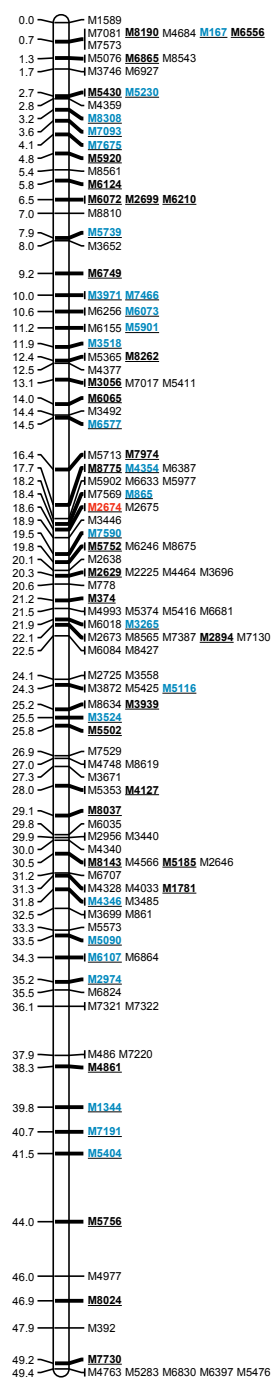

# PMA21

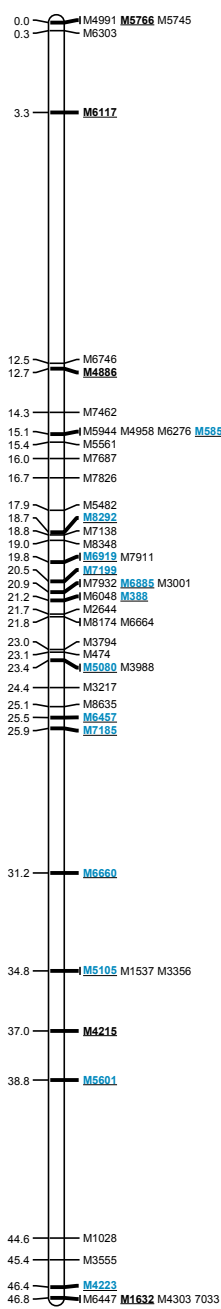

# PMA22

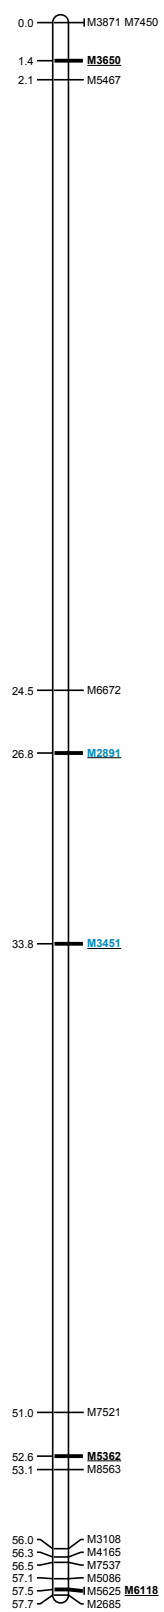

# PMA23

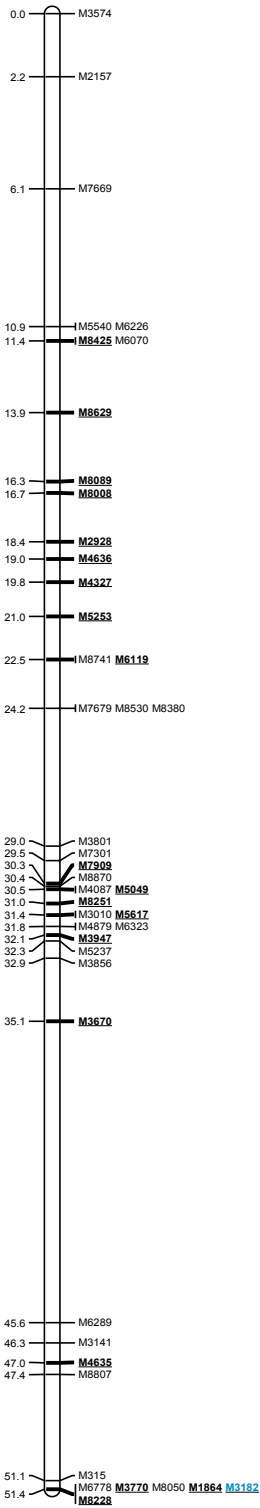

# PMA24

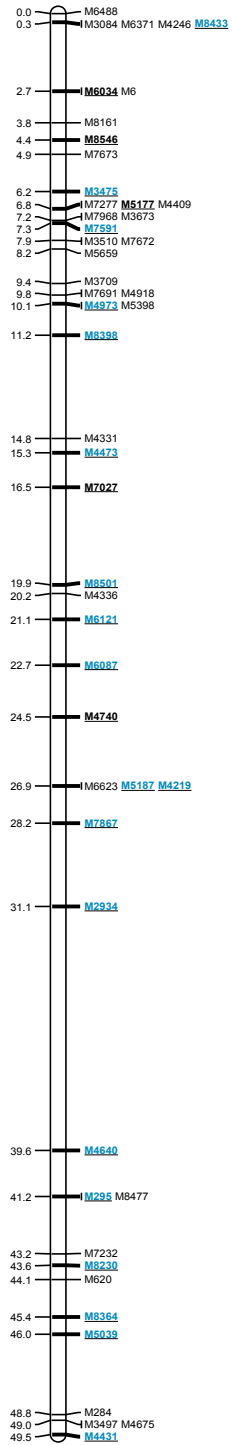

# PMA25A

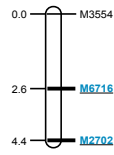

# PMA25B

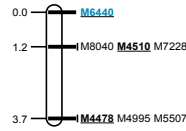

# PMALGE22

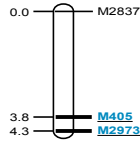

# PMA26

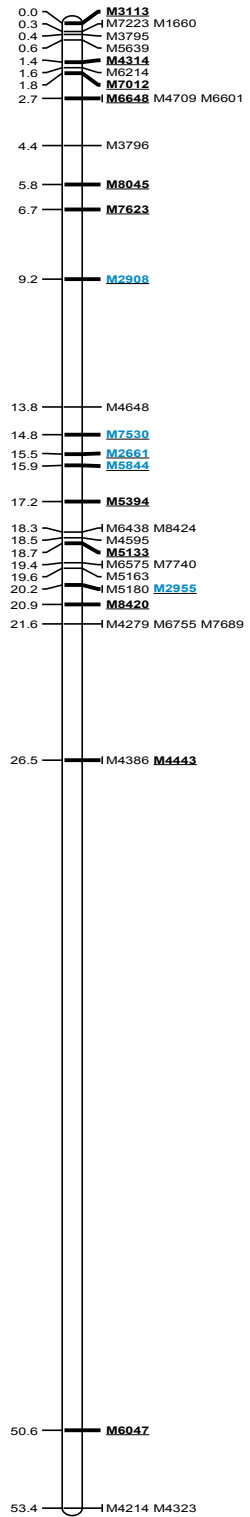

# PMA27

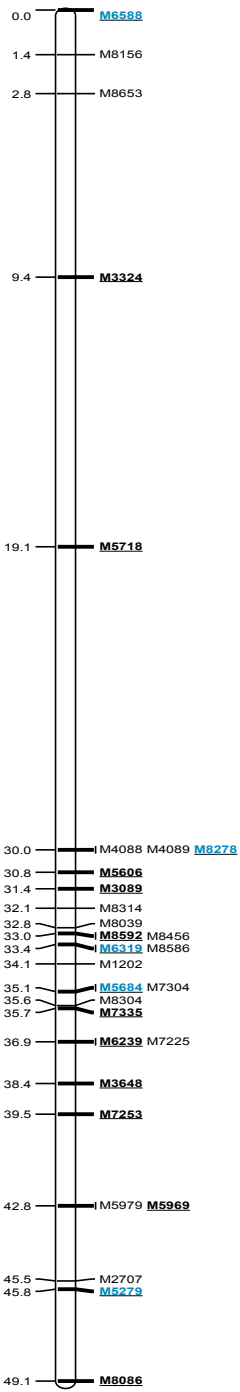

# PMA28

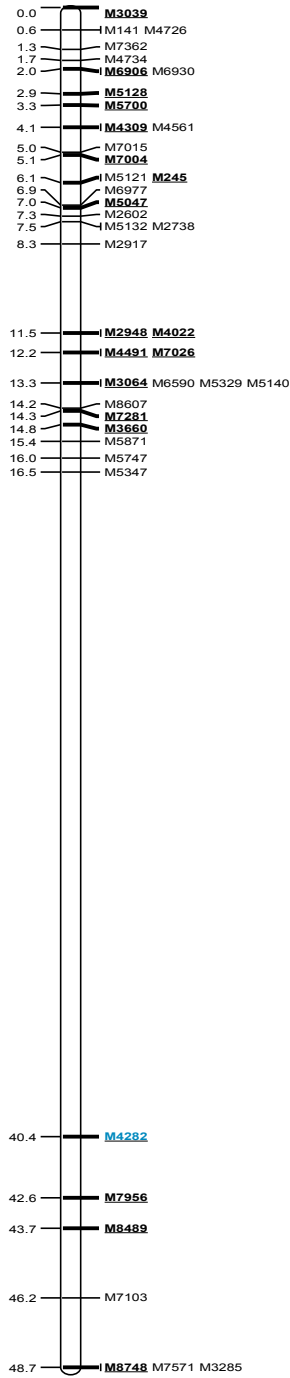

# PMAZ

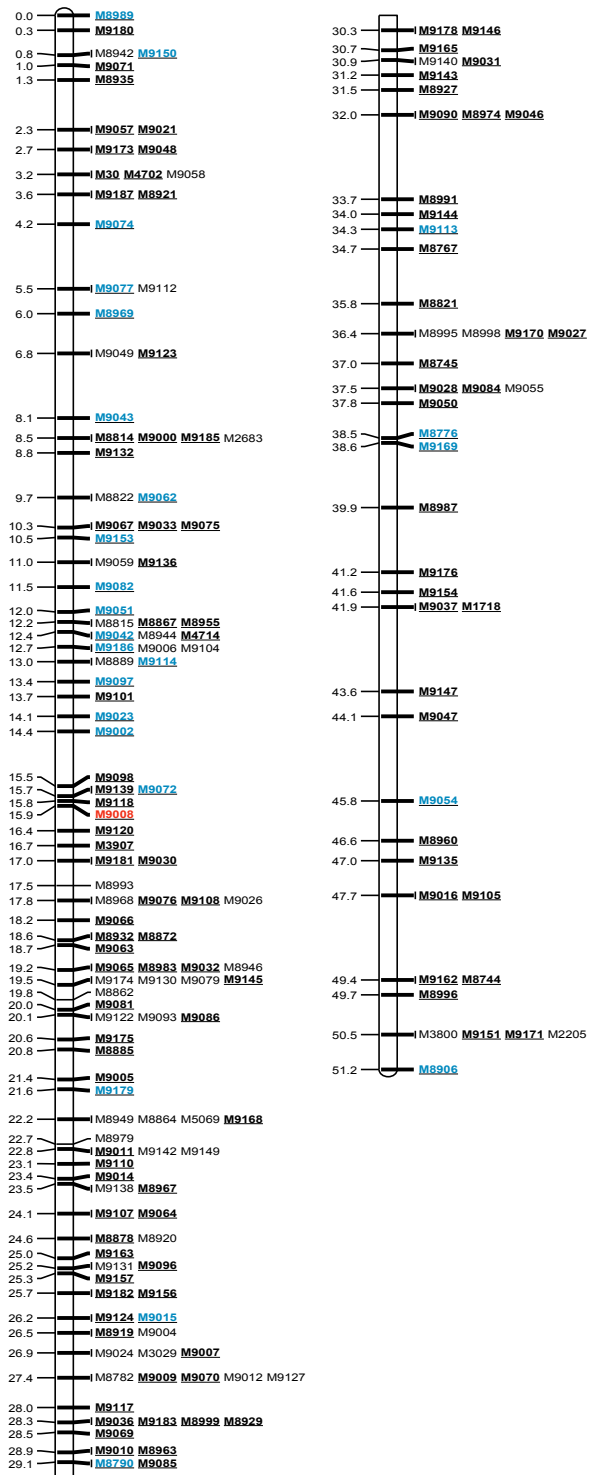

Supplement: hdy2013107x3.pdf [file hdy2013107x3.pdf]
