# Supplementary material for: Replicated high-density genetic maps of two great tit populations reveal fine-scale genomic departures from sex-equal recombination rates
Source: PubMed Central journal article supplement — Heredity (Edinb). 2013 Oct 23;112(3):307–16. doi: 10.1038/hdy.2013.107 (PMC3931172; doi:10.1038/hdy.2013.107), 2013-10-23
Supplement: hdy2013107x1.pdf [file hdy2013107x1.pdf]

2 **Supplementary Material**

3

4 **SUPPLEMENTARY METHODS**

5

6 **Study species and Mapping populations**

7 The genotyped individuals in the NL captive population were selected from 480 individuals of the fourth  
8 generation of artificial selection on Early Exploratory Behaviour (Drent *et al.* 2003) and their F1 and F2  
9 intercrosses (van Oers *et al.* 2004). We bred F1 intercrosses from 2000 until 2008, and F2 intercrosses from  
10 2002-2009. For the NL mapping population individuals were selected based on the pedigree links within the  
11 captive population. Offspring were checked for genetic compatibility with their genotyped parents by counting  
12 the number of Mendelian inheritance errors for autosomal SNPs using Genome Studio software (Illumina).  
13 When parent-offspring mismatches exceeded 100, offspring were omitted from the pedigree (N=7). For the  
14 final mapping pedigree (N=398), we included all F2 intercross individuals (N=251), their F1 parents, the siblings  
15 of these F1 parents and all full-sib selection line families with their parents. These individuals were manually  
16 split into 35 sub-families: 9 sub-families consisted of selection line offspring with their parents, 9 sub-families  
17 with F1 intercross offspring with their parents and 17 sub-families with F2 intercross offspring, their F1  
18 intercross parents and their selection line grandparents. Three F2 families also contained half-sibs, and  
19 therefore included more than two F1 parents and more than four selection line grandparents. The mean family  
20 size was 15.0 (range 5-35). Sex was confirmed using the molecular method of Griffiths *et al.* (1998). We  
21 checked for non-inheritance errors using the PREPARE option in LISPCRI, a modified version of CriMap and  
22 excluded all non-inheritance errors by setting the genotypes to zero (thereby excluding them from further  
23 analyses) using a Perl script.

24

25 UK individuals were selected for genotyping based on (i) availability of sufficient DNA for genotyping (>50  
26 ng/mL, as quantified by the PicoGreen assay), (ii) availability of phenotypic measurements, particularly  
27 morphological measurements, adult life history data, exploration rate and other personality data, social  
28 network data and basal metabolic rate measurements, and (iii) pedigree links within the Wytham pedigree,

29 which contains ~80,000 individuals born since 1958. The social pedigree of the genotyped individuals of the UK  
30 population was constructed from field observations, where expected parentage was determined from  
31 capturing males and females within nest boxes containing nestling great tits. Great tit nestlings (and previously  
32 un-marked adults) were marked individually using aluminium rings fitted to the tarsus. Relationships in the  
33 pedigree were confirmed using a number of methods. First, SNPs assigned a putative zebra finch mapping  
34 position on the Z chromosome (based on sequence homology between SNP flanking sequence and the zebra  
35 finch genome sequence) were used to confirm the sex of the genotyped individuals; homozygosity by locus (HL)  
36 of Z-linked markers was calculated using the 'GENHET' package (Coulon 2010) in R version 2.11.1 (R  
37 Development Core Team 2006). Individuals with HL values of 0-0.7 were assigned as male, while individuals  
38 with HL values of 0.9-1 were assigned as female, where the distribution of HL values is bimodal, with no overlap  
39 between the sexes. The ID of seven individuals whose genetic sex was incompatible with their recorded sex (i.e.  
40 sample mislabelling or lab errors) was assigned as "unknown" and all pedigree links to these samples were  
41 removed. Ten individuals with HL values between 0.7-0.9 were assigned their recorded sex (0.26% of  
42 individuals).

43  
44 Second, genotyped individuals were checked for genetic compatibility with their genotyped parents and their  
45 offspring by counting the number of Mendelian inheritance errors for autosomal SNPs. Inheritance errors were  
46 summed for each parent individually to determine whether mismatches were predominantly due to  
47 mismatches with the social father, which is likely to be caused by extra pair paternity (i.e. inconsistency  
48 between the social and genetic pedigree), in which case the pedigree link to the father was removed (91 of the  
49 682 individuals with both parents genotyped). In general, individuals who raised approximately equal numbers  
50 of mismatches with each parent were labelled as "unknown" and all pedigree links removed (40 of the 682  
51 individuals with both parents genotyped), although in some cases (e.g. genotype consistency with the  
52 individual's offspring) pedigree links were only removed in one direction (i.e. links to the parents but not  
53 offspring). Where only one parent was genotyped and a large number of inheritance errors were raised, the  
54 individual was renamed as unknown and all pedigree links removed (81 of the 1,096 individuals with at least  
55 one parent genotyped). Next, identity by state (IBS) allele sharing at the autosomal markers was calculated  
56 between all pairs of individuals using PLINK (Purcell *et al.* 2007). This identified 72 pairs of individuals with  
57 identical genotypes (IBS values of >0.99), suggesting sample mislabelling or lab errors (representing 2.7% of the

58 genotyped individuals). In the absence of first-degree genotyped relatives to confirm the true identity of both  
59 individuals, both were labelled as "unknown" and pedigree links removed.

60

61 Finally, categorical paternity analyses were carried out to assign genetic fathers to individuals resulting from  
62 extra pair paternities (a total of 91 individuals compatible with their genotyped social mother but not their  
63 genotyped social father), using CERVUS 3.0 (Kalinowski *et al.* 2007). All genotyped males were included in the  
64 pool of candidate fathers. To assess whether the paternity could be assigned to the male with the highest  
65 paternity likelihood, the difference in likelihood score between the most likely fathers was compared to a  
66 simulated distribution obtained from 10,000 simulated mating events. Pedigree links were subsequently  
67 restored for the 59 birds (out of 91) for which a father was assigned with strict confidence (> 95%) in CERVUS. A  
68 subset of 1,656 Wytham individuals with confirmed first degree pedigree links (genotyped parents and/or sibs  
69 and/or offspring) were chosen for constructing the UK great tit linkage map. Parent-offspring genotype errors  
70 were removed by setting the genotypes to unknown. For the UK population complex pedigrees were first split  
71 into 61 subfamilies (of approximately 50 individuals and 3 generations) using the CRIGEN command (options: -  
72 size 50 and -gen 3) in the version of CriMap modified by Xuelu Liu (see below).

73

#### 74 **Map construction**

75 For linkage mapping we used version 2.503 of the CriMap software (Green *et al.* 1990) modified by Jill Maddox  
76 (Department of Veterinary Science, University of Melbourne, Australia) to better handle large datasets , and its  
77 interface, the Linkage Mapping Software, developed by Xuelu Liu (Monsanto) to accommodate large numbers  
78 of markers segregating in a complicated pedigree structure. The likelihood of linkage between all possible pairs  
79 of markers was calculated using the TWOPOINT option (options phase unknown likelihood tolerance:  
80 PUK\_LIKE\_TOL = 1 and phase known likelihood tolerance: PK\_LIKE\_TOL = 1). Linkage mapping is an iterative  
81 process, and we chose to present 3 different steps of this process in this paper: (i) framework maps,  
82 incorporating markers when they could be assigned a most likely position with LOD > 3, where the best marker  
83 order is at least  $10^3 = 1000$  times more likely than any alternative order. (ii) comprehensive maps, where “non-  
84 framework” markers were added using lower levels of stringency (LOD > 0.1) and (iii) parsimonious maps,  
85 including as many additional markers as possible.

86

87 We applied two different initial strategies for linkage group construction. For the NL map, we assigned 6877  
88 SNPs to putative great tit chromosomes based on sequence homology between SNP flanking sequences and  
89 the zebra finch genome sequence v 3.2.4.63. We used the option HAPSYS to group SNPs that had zero  
90 recombination with each other. Only the most informative SNP of such a haplotype-group was used for  
91 mapping. The recombination rates of the other SNPs were not fixed to zero, so that SNPs were not forced onto  
92 the same map position in cases where the recombination with other markers varied between markers within a  
93 haplotype group. This was done to lower calculation times, but will not result in a different map.

94

95 For the UK map, we used the TWOPOINT output of CriMap to create linkage groups with the AUTOGROUP  
96 command. AUTOGROUP employs an iterative process to group linked markers on the basis of the likelihood of  
97 linkage and the marker variability, beginning with very high stringency and proceeding through layers of lower  
98 stringency. Parameters include (i) the minimum threshold of LOD score for a linkage to be considered, (ii)  
99 minimum number of informative meioses for a marker to be included in terms of x times the mean number of  
100 informative meioses, (iii) the maximum number of linkages to other groups, and (iv) minimum linkage ratio for  
101 a marker's qualified links to the best linkage group (i.e., the proportion of two-point linkages for a given marker  
102 that are to markers that are all in the same linkage group) (see e.g. Stapley *et al.* 2008). The parameter layers  
103 were as follows: layer 1 (40, 2.0, 2.0, 0.9); layer 2 (20, 1.5, 2, 0.9); layer 3 (10, 1.0, 2, 0.9); and layer 4 (10, 0.5, 2,  
104 0.9).

105

#### 106 (i) Building framework maps

107 To construct both the UK and NL chromosome maps, the most parsimonious marker order was determined  
108 using the BUILD command. BUILD uses an iterative multipoint-likelihood maximization process, thereby  
109 producing the order with the highest likelihood. In general, we choose two or three markers as anchors for the  
110 first build, selecting markers on the basis of a high number of informative meiosis, intermediate recombination  
111 rates and high twopoint LOD scores. For the NL map, markers were initially added to the map with very high  
112 stringency (options PUK\_LIKE\_TOL = 7 and PK\_LIKE\_TOL = 7). The stringency was then lowered stepwise to  
113 PUK\_LIKE\_TOL = 3 and PK\_LIKE\_TOL = 3. For construction of the UK framework map, markers were added to  
114 the map with 'high' stringency (options PUK\_LIKE\_TOL = 3 and PK\_LIKE\_TOL = 3) in one step. These LOD-score

115 values (>3) indicate that markers were only added to a map position if that solution was 1,000 times more  
116 likely than any other position.

117

118 Next, the order of markers in the framework map was tested by running the FLIPS7 option, which carries out  
119 permutations of marker order within groups of seven consecutive markers and calculates the likelihood of all  
120 other possible orders. If the initial likelihood was improved by locally reordering the markers, this change was  
121 made and FLIPS7 run again until no alternative order with higher likelihood could be found. Additionally,  
122 markers causing high numbers of double recombinants (i.e., markers likely to have relatively high error rates  
123 and/or in an incorrect position in the map) were identified using CHROMPIC. The modified version of CriMap  
124 (2.5.03) produces an output table with possible erroneous genotypes. For the NL dataset, we removed  
125 potentially problematic markers and excluded incorrect genotypes with a Python script ([www.python.org](http://www.python.org)) we  
126 wrote to update the genotype files, while for the UK dataset a script was written to identify problematic  
127 markers from the CHROMPIC output.

128

129 After this initial step, the process of building the map was repeated, now starting with the last build order.  
130 BUILD, FLIPS7 (or FLIPS5, with increasing marker numbers for the NL dataset) and CHROMPIC steps were  
131 repeated until no bad markers and no better order appeared.

132

### 133 (ii) Building comprehensive maps

134 Once framework maps were completed, comprehensive maps were built for each linkage group. Framework  
135 maps of each population were used as anchors to start adding more markers to the map. Markers were added  
136 stepwise by lowering PUK\_LIKE\_TOL and PK\_LIKE\_TOL to 0.1; as with the framework maps, this was done in  
137 one step for the UK map and in multiple steps for the NL map. FLIPS5 and CHROMPIC options were then used  
138 to check for local rearrangements or bad markers or genotypes. Again, BUILD, FLIPS5 and CHROMPIC were all  
139 repeated until no better orders were identified.

140

### 141 (iii) Building parsimonious maps

142 A final stage of mapping was carried out to add as many markers as possible to the **comprehensive** map  
143 (parsimonious map). PUK\_LIKE\_TOL and PK\_LIKE\_TOL were lowered to 0.001 to identify markers to add to the

144 existing comprehensive maps. For the UK map, new markers (compared to the comprehensive map) were  
145 discarded if they aligned to a different zebra finch chromosome than the other markers on the linkage group  
146 (this was not applicable for the NL map, since they were already discarded in the first step). For both for the UK  
147 and NL map, markers were discarded if their predicted zebra finch physical position was very different (> 5 000  
148 000 bases) from other markers next to the mapping position of the parsimonious marker had been added to.  
149 For the NL map, after lowering PUK\_LIKE\_TOL and PK\_LIKE\_TOL to 0.001, the only remaining unmapped  
150 markers had multiple possible positions on the map. From these, markers that could be positioned to fewer  
151 than four possible adjacent map positions with equal likelihood were added to the NL comprehensive map. For  
152 the UK map, the marker was added next to the marker with the closest position on the zebra finch genome,  
153 provided the map location of the latter marker was consistent with its location on the zebra finch genome.  
154 Markers that increased the overall length in centiMorgans (cM) of the chromosome substantially (~10% or  
155 more), were discarded. Map figures were drawn using the MapChart software version 2.2 (Voorrips 2002).

156

157 For the UK data set, the entire mapping process took over six months for all chromosomes to be completed,  
158 with FLIP55 on the comprehensive maps in particular taking up to four weeks for the larger chromosomes. For  
159 the NL linkage maps, this process was longer (over 14 months) due to the stepwise lowering of the likelihood  
160 thresholds, limitations on computing memory, and one (KvO) versus two (AWS & IDC) personnel dedicated to  
161 map construction.

162

163

164 Coulon A. (2010). GENHET: an easy-to-use R function to estimate individual heterozygosity. *Molecular Ecology Resources*, 10, 167-169.

165 Drent P.J., van Oers K. & van Noordwijk A.J. (2003). Realized heritability of personalities in the great tit (*Parus major*). *Proceedings of the*  
166 *Royal Society of London Series B-Biological Sciences*, 270, 45-51.

167 Green P., Falls K. & Crooks S. (1990). Documentation for CRI-MAP. In. Washington University, St. Louis.

168 Griffiths R., Double M.C., Orr K. & Dawson J.G. (1998). A DNA test to sex most birds. *Molecular Ecology*, 7, 1071-1075.

169 Kalinowski S.T., Taper M.L. & Marshall T.C. (2007). Revising how the computer program CERVUS accommodates genotyping error increases  
170 success in paternity assignment. *Molecular Ecology*, 16, 1099-1106.

171 Purcell S., Neale B., Todd-Brown K., Thomas L., Ferreira M.A.R., Bender D., Maller J., Sklar P., de Bakker P.I.W., Daly M.J. & Sham P.C.

172 (2007). PLINK: A tool set for whole-genome association and population-based linkage analyses. *American Journal of Human*

173 *Genetics*, 81, 559-575.

174 Stapley J., Birkhead T.R., Burke T. & Slate J. (2008). A linkage map of the zebra finch *Taeniopygia guttata* provides new insights into avian  
175 genome evolution. *Genetics*, 179, 651-667.

176 Team R.D.C. (2006). R Foundation for Statistical Computing. URL <http://www.R-project.org>. In. R foundation for Statistical Computing  
177 Vienna, Austria.

178 van Oers K., Drent P.J., De Jong G. & van Noordwijk A.J. (2004). Additive and nonadditive genetic variation in avian personality traits.  
179 *Heredity*, 93, 496-503.

180 Voorrips R.E. (2002). MapChart: Software for the graphical presentation of linkage maps and QTLs. *Journal of Heredity*, 93, 77-78.

181

182

183 Titles and legends to Supplementary figures

184

185 **Supplementary Table 1. The between-population cross-correlation in local heterochiasmy, when SDI\_local**  
186 **was estimated in 20-marker intervals in a 5-marker sliding window analysis.**

187 Supplementary figure 1. Parsimonious genetic linkage map in centiMorgan (cM) of the great tit mapped in the  
188 NL population. The framework map loci (order supported by LOD>3) are in boldface and underlined on the  
189 linkage maps. **Of these, framework markers that were unique to the NL map are indicated in black. SNPs that**  
190 **were present in the same order on the framework maps of both the NL and the UK population are indicated**  
191 **in blue, framework markers that that were present on both maps, but in different order are indicated in red.**

192 Supplementary figure 2. Parsimonious genetic linkage map in centiMorgan (cM) of the great tit mapped in the  
193 UK population. The framework map loci (order supported by LOD>3) are in boldface and underlined on the  
194 linkage maps. **Of these, framework markers that were unique to the UK map are indicated in black. SNPs that**  
195 **were present in the same order on the framework maps of both the NL and the UK population are indicated**  
196 **in blue, framework markers that that were present on both maps, but in different order are indicated in red.**

197 Supplementary figure 3. The parsimonious linkage map positions in centiMorgan (cM) of markers that were  
198 mapped on both the UK and the NL linkage map.

199 Supplementary figure 4. Recombination landscape for each great tit linkage map on the NL linkage map,  
200 plotted as the linkage map position in centiMorgan (cM) against the map order.

201 Supplementary figure 5. **Size Dimorphism Index (SDI) calculated for windows of 20 (a), 30 (b) or 50 (c) SNP**  
202 **markers on the NL (orange) and UK (blue) framework maps. Subsequent windows were chosen by sliding the**  
203 **window 10 (a), 15 (b) or 10 (c) SNP markers along the linkage group. Positive SDI estimates indicate that**  
204 **female recombination rates of that 20 SNP marker window was higher, negative values when the male rates**  
205 **are highest. Only linkage groups are plotted with at least three windows or more.**

206 **Supplementary figure 6. Comparative maps containing great tit linkage map positions in centiMorgans (cM)**  
207 **plotted against the predicted zebra finch physical position for each great tit chromosome. Only**  
208 **chromosomes with predicted zebra finch positions for 10 or more markers are plotted.**

209 **Supplementary figure 7. Comparative maps containing great tit linkage map positions in centiMorgans (cM)**  
210 **plotted against the predicted chicken physical position for each great tit chromosome. Only chromosomes**  
211 **with predicted chicken positions for 10 or more markers are plotted.**

212



213 Supplementary table 1.

214

| <b>Linkage group</b> | <b>Cross Correlation in SDI_local</b> |
|----------------------|---------------------------------------|
| <b>1</b>             | 0.668                                 |
| <b>1A</b>            | 0.870                                 |
| <b>2</b>             | 0.375                                 |
| <b>3</b>             | 0.477                                 |
| <b>4</b>             | 0.646                                 |
| <b>4A</b>            | 0.494                                 |
| <b>5</b>             | 0.813                                 |
| <b>6</b>             | 0.050                                 |
| <b>7</b>             | 0.649                                 |
| <b>8</b>             | 0.459                                 |
| <b>9</b>             | 0.598                                 |
| <b>10</b>            | 0.575                                 |
| <b>11</b>            | 0.621                                 |
| <b>12</b>            | 0.815                                 |
| <b>13</b>            | 0.712                                 |
| <b>14</b>            | 0.690                                 |
| <b>15</b>            | 0.553                                 |
| <b>17</b>            | 0.673                                 |
| <b>18</b>            | 0.919                                 |
| <b>19</b>            | 0.963                                 |
| <b>20</b>            | 0.694                                 |
| <b>21</b>            | 0.999                                 |
| <b>24</b>            | 0.992                                 |

215

216
