# Supplementary material for: Replicated high-density genetic maps of two great tit populations reveal fine-scale genomic departures from sex-equal recombination rates
Source: PubMed Central journal article supplement — Heredity (Edinb). 2013 Oct 23;112(3):307–16. doi: 10.1038/hdy.2013.107 (PMC3931172; doi:10.1038/hdy.2013.107), 2013-10-23
Supplement: hdy2013107x8.pdf [file hdy2013107x8.pdf]

NL map position (cM)

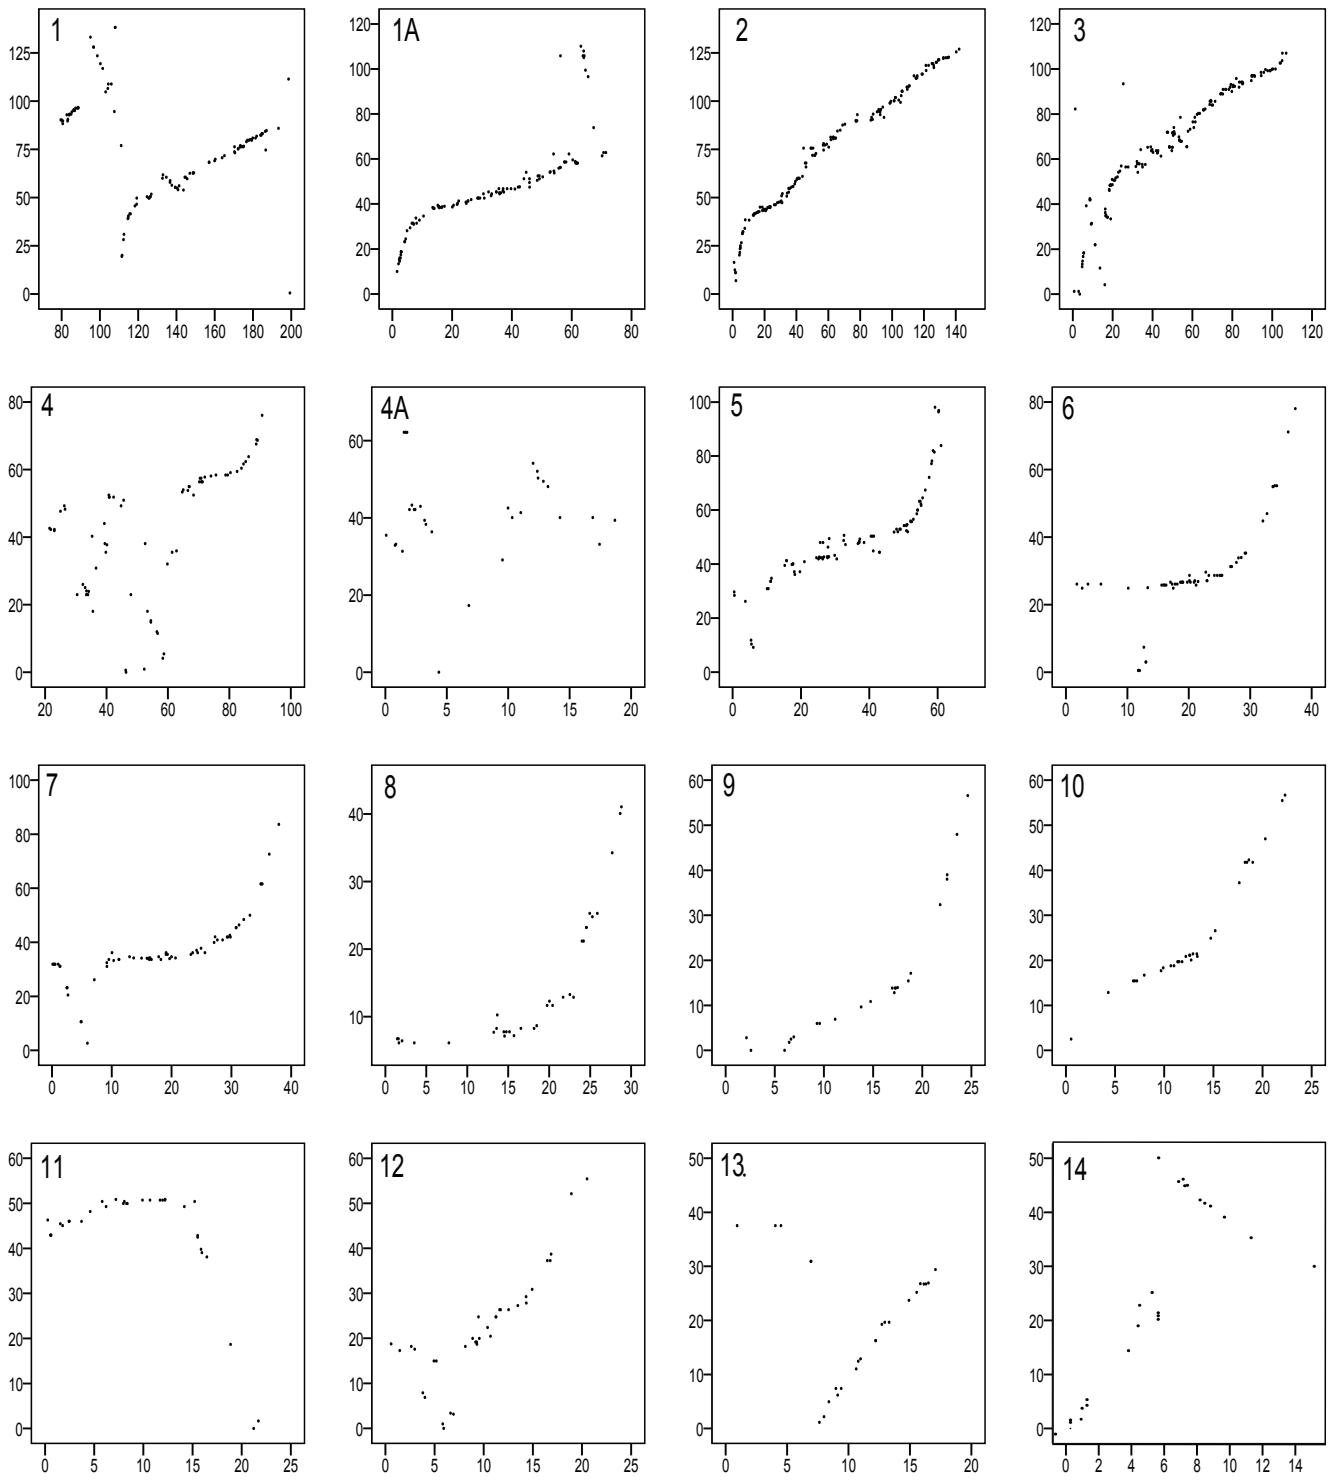

Chicken physical position (Mbp)

Supplementary Figure 7.

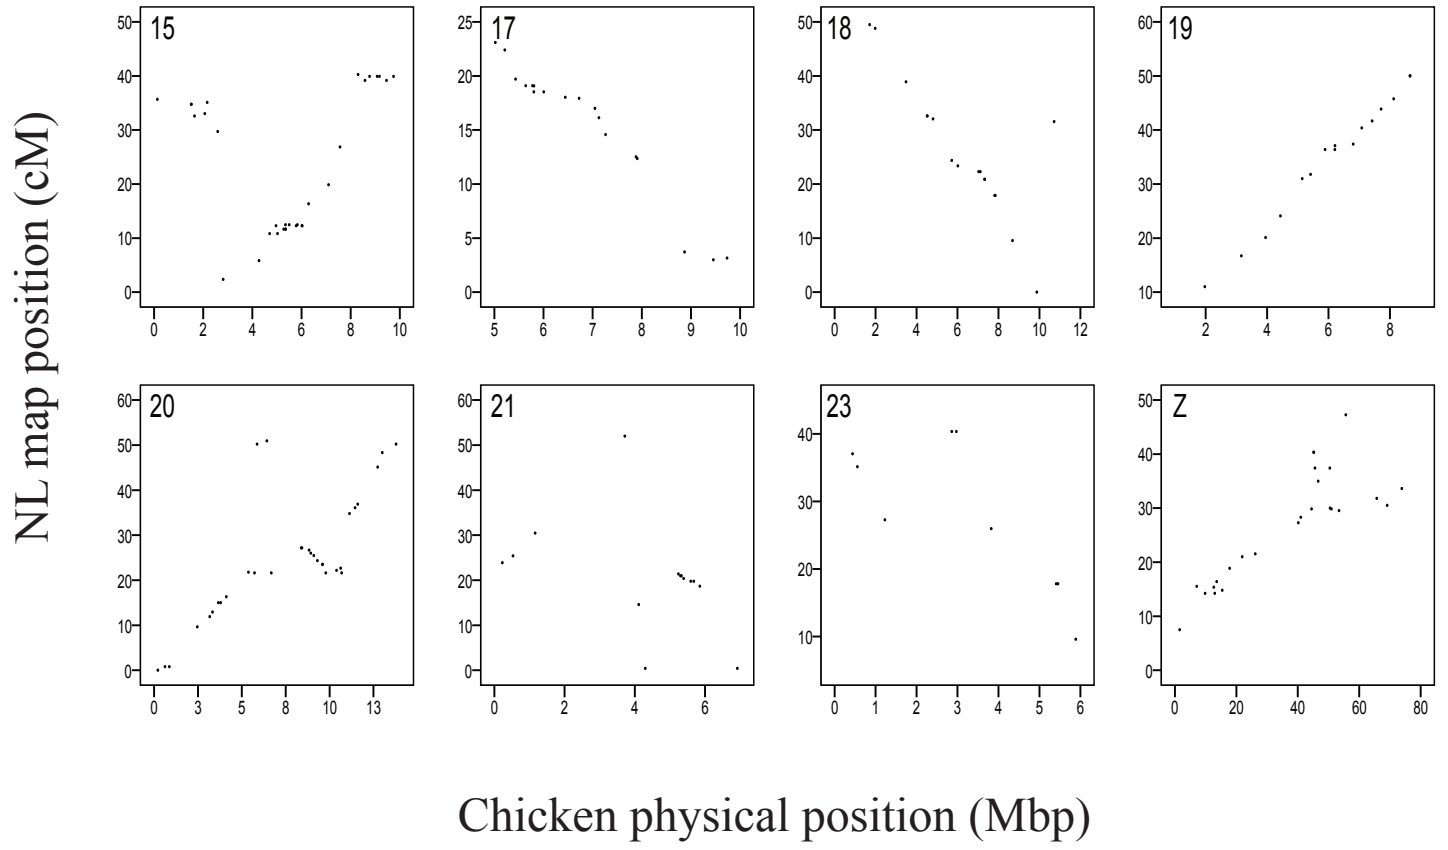

Supplementary Figure 7: Continued
