# Supplementary figures and images for: Replicated high-density genetic maps of two great tit populations reveal fine-scale genomic departures from sex-equal recombination rates
Source: PubMed Central journal article supplement — Heredity (Edinb). 2013 Oct 23;112(3):307–16. doi: 10.1038/hdy.2013.107 (PMC3931172; doi:10.1038/hdy.2013.107), 2013-10-23

SDI

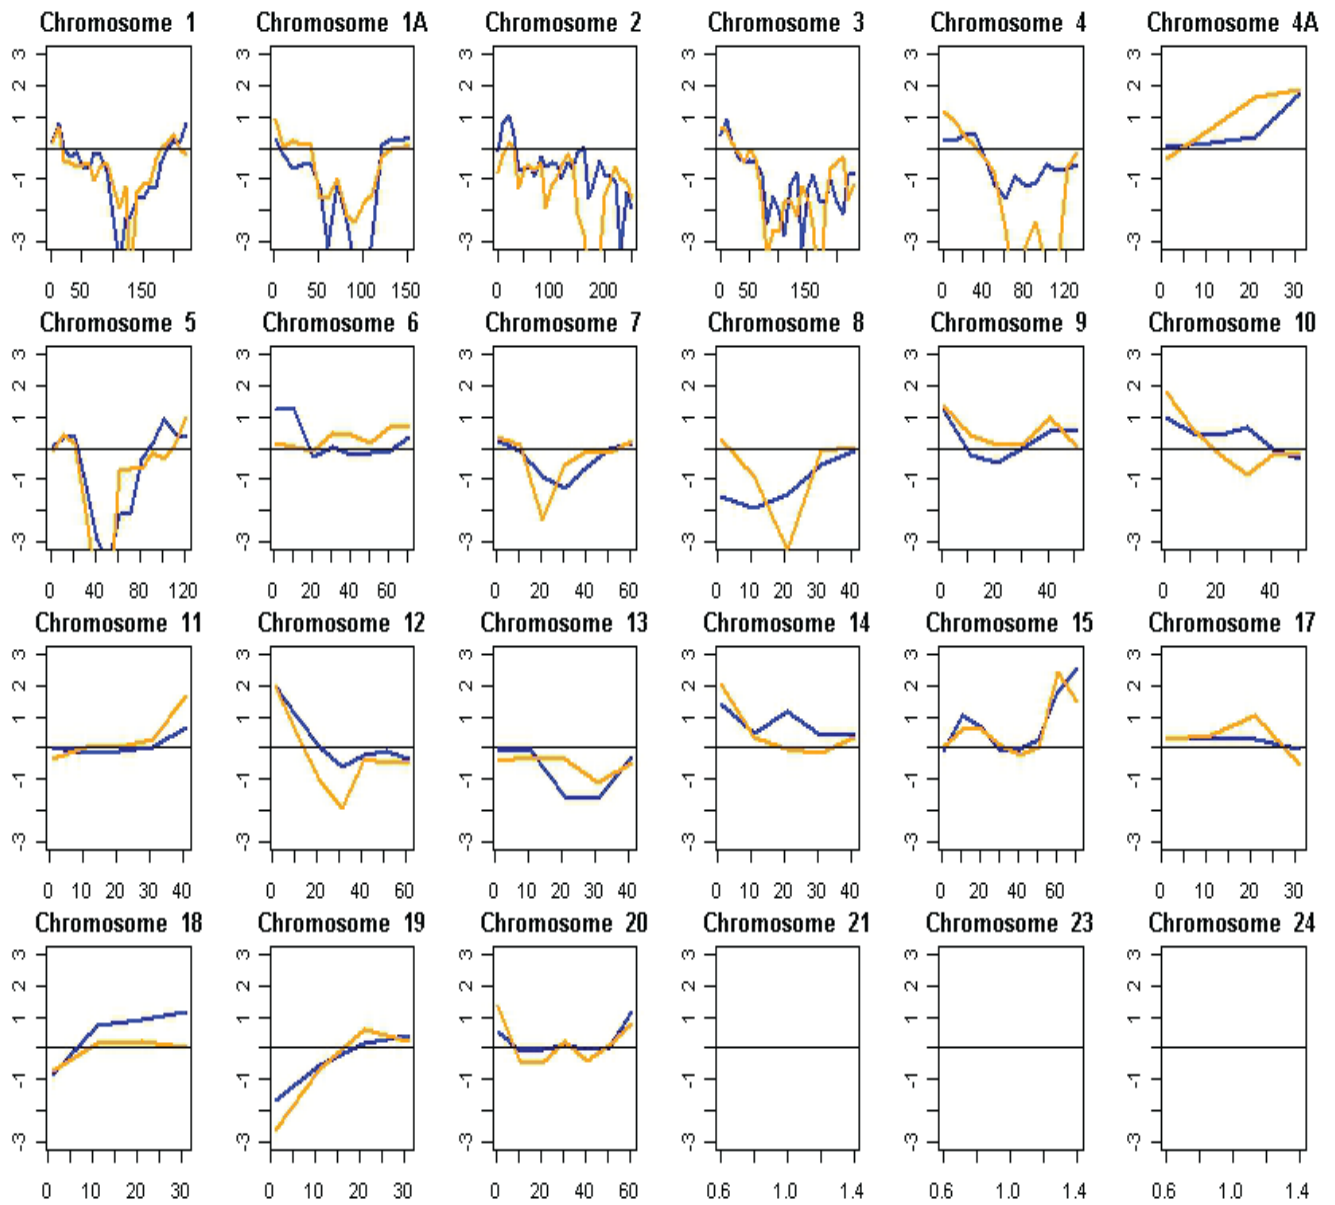

Marker Order

SDI

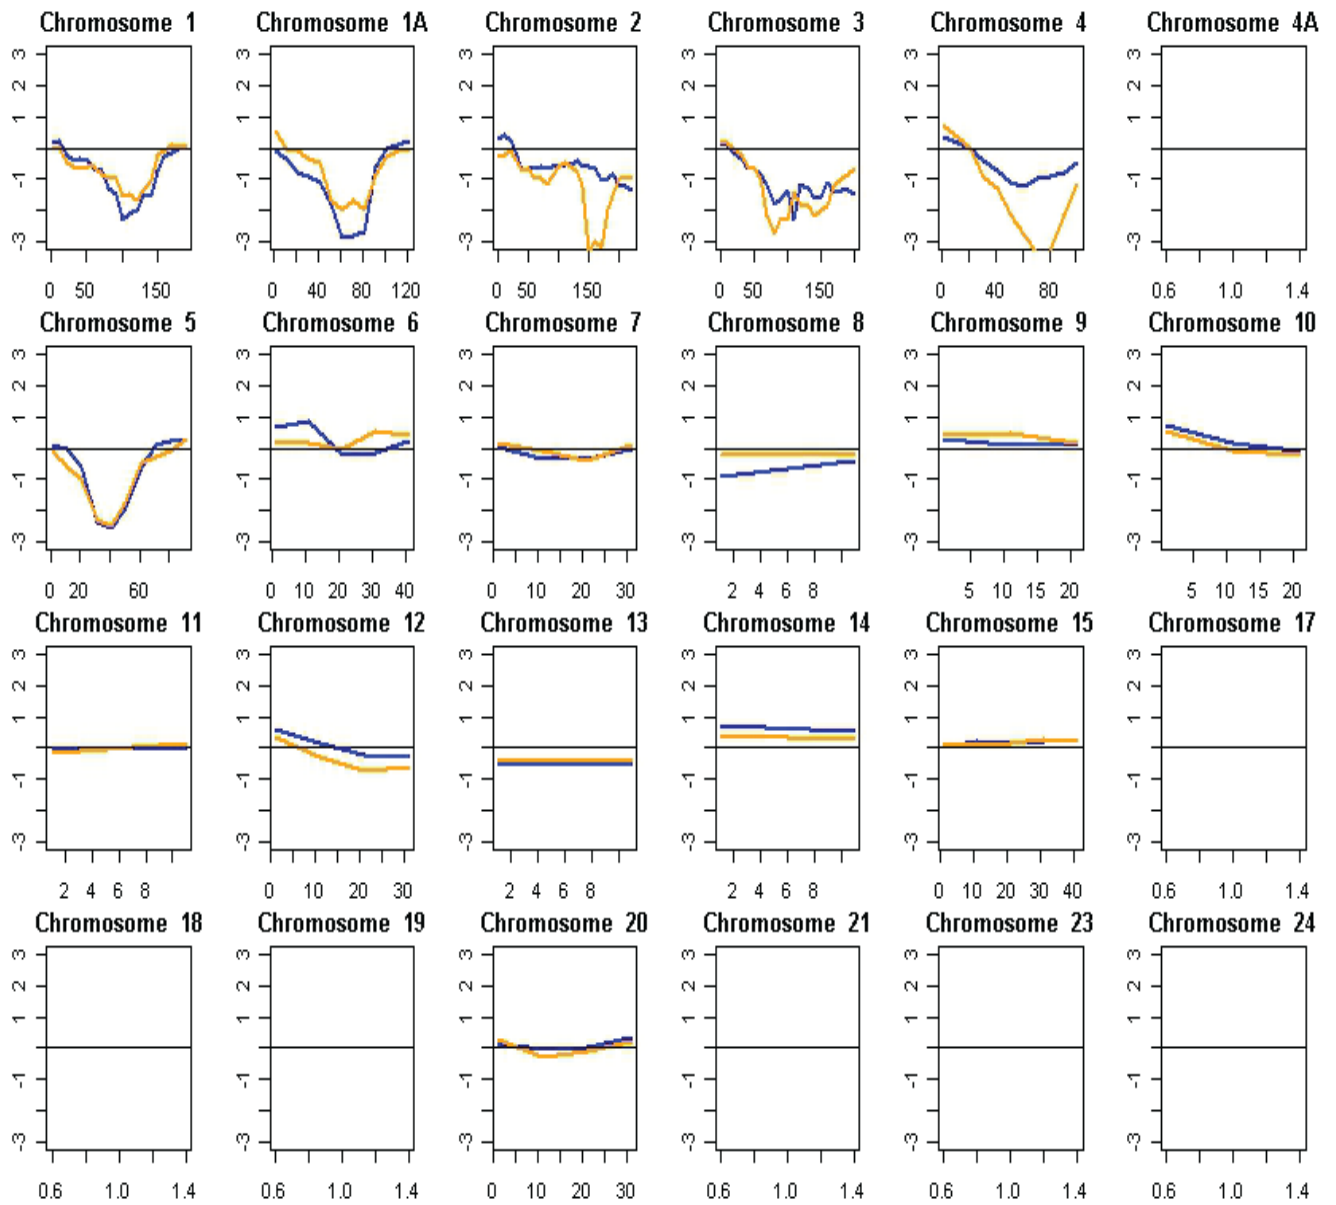

Marker Order

SDI

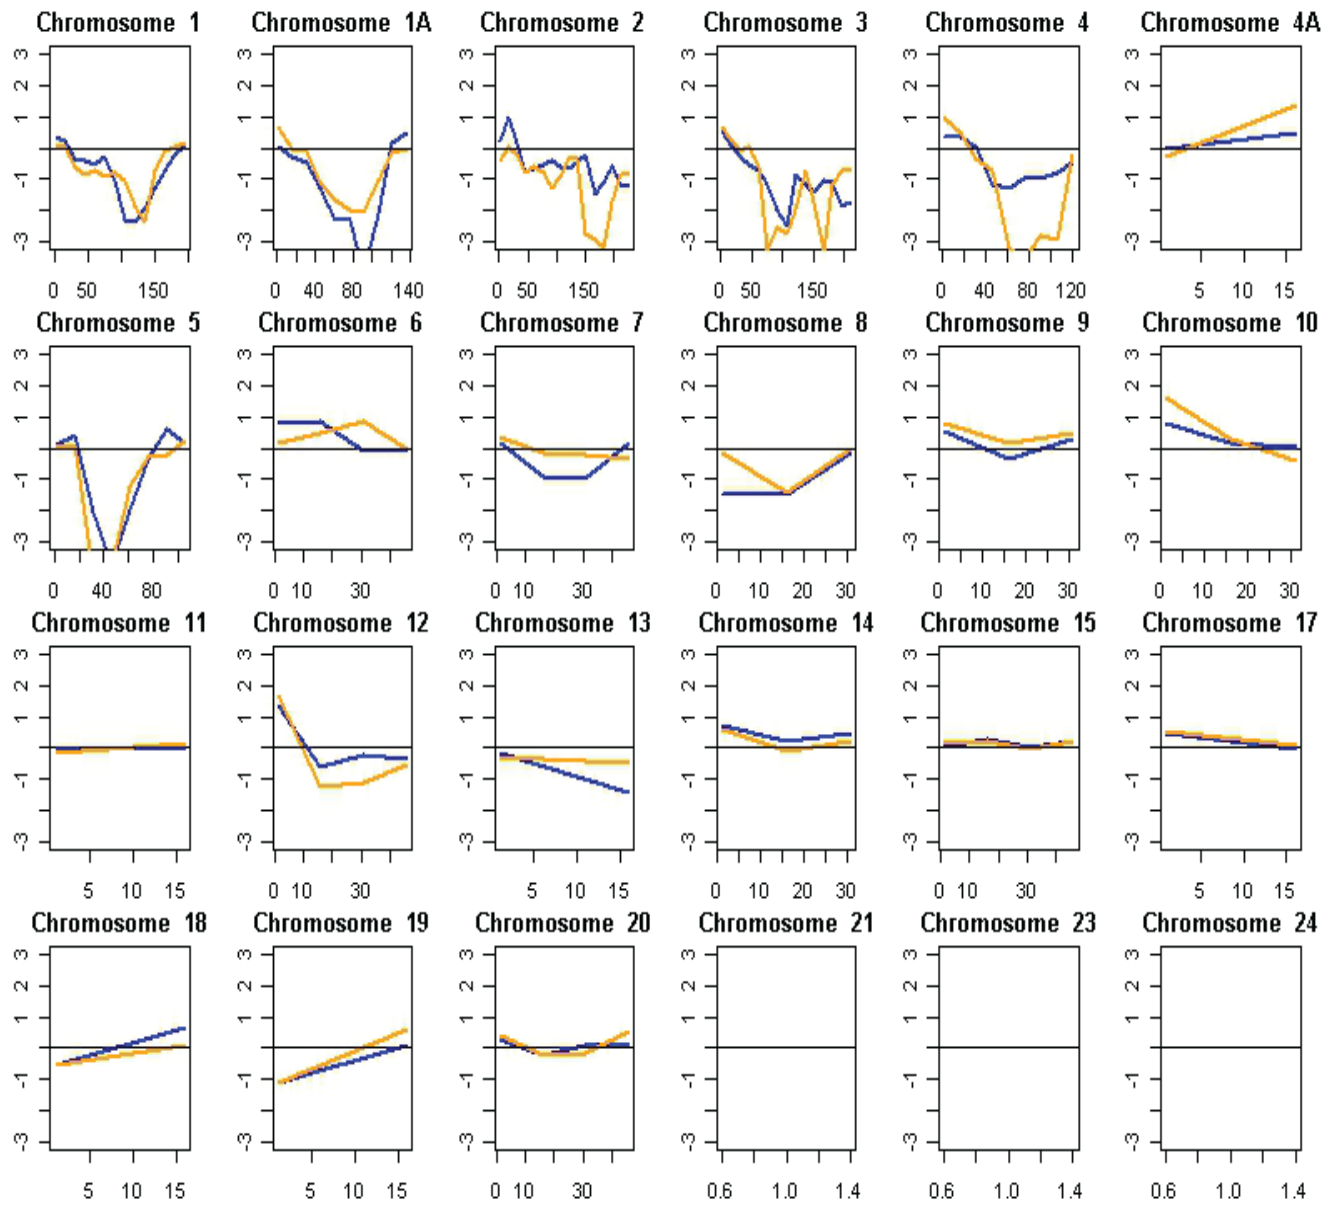

Marker Order

Supplementary Figure 5b.

Supplement: hdy2013107x6.pdf [file hdy2013107x6.pdf]
